# Supplementary material
Source: PubMed Central journal article supplement (PMC3029096)

# Esterification of an Unnatural Amino Acid Structurally Deviating from Canonical Amino Acids Promotes Its Uptake and Incorporation into Proteins in Mammalian Cells

Jeffrey K. Takimoto, Zheng Xiang, Ji-Yong Kang and Lei Wang\*

The Jack H. Skirball Center for Chemical Biology & Proteomics,  
The Salk Institute for Biological Studies,  
10010 N. Torrey Pines Road,  
La Jolla, CA 92037-1099, USA

## SUPPORTING INFORMATION

### *Experimental data for compounds*

**Compound 6.**  $^1\text{H}$  NMR (500 MHz,  $\text{CDCl}_3$ ):  $\delta_{\text{H}}$  = 8.56 (d,  $J$  = 8.5 Hz, 1 H), 8.25-8.22 (m, 2 H), 7.57-7.50 (m, 2 H), 7.18 (d,  $J$  = 7.0 Hz, 1 H), 5.45 (t,  $J$  = 6.5 Hz, 1 H), 5.39 (d,  $J$  = 6.5 Hz, 1 H), 4.29 (brs, 1 H), 3.59 (s, 3 H), 3.35-3.26 (m, 2 H), 2.89 (s, 6 H), 1.40 (s, 9 H) ppm;  $^{13}\text{C}$  NMR (125 MHz,  $\text{CDCl}_3$ ):  $\delta_{\text{C}}$  = 170.7, 155.5, 152.0, 134.4, 130.8, 130.0, 129.9, 129.6, 128.8, 128.6, 128.4, 123.3, 118.8, 115.4, 80.5, 53.5, 52.8, 45.5, 44.9, 28.2 ppm.

**Compound 7.**  $^1\text{H}$  NMR (500 MHz,  $\text{CDCl}_3$ ):  $\delta_{\text{H}}$  = 8.55 (d,  $J$  = 8.5 Hz, 1 H), 8.25-8.22 (m, 2 H), 7.56 (t,  $J$  = 8.0 Hz, 1 H), 7.52 (t,  $J$  = 8.0 Hz, 1 H), 7.19 (d,  $J$  = 7.5 Hz, 1 H), 5.39 (t,  $J$  = 6.5 Hz, 1 H), 4.26 (brs, 1 H), 4.14-4.05 (m, 1 H), 4.03-3.97 (m, 1 H), 3.35-3.30 (m, 1 H), 3.28-3.23 (m, 1 H), 2.89 (s, 6 H), 1.52 (s, 9 H), 1.17 (t,  $J$  = 7.2 Hz, 3 H) ppm;  $^{13}\text{C}$  NMR (125 MHz,  $\text{CDCl}_3$ ):  $\delta_{\text{C}}$  = 170.2, 155.5, 152.0, 134.4, 130.8, 130.0, 129.9, 129.6, 128.7, 123.3, 118.9, 115.5, 80.5, 62.2, 53.6, 45.6, 45.0, 28.3, 14.1 ppm.

**Compound 2.**  $^1\text{H}$  NMR (500 MHz,  $d_6$ -DMSO):  $\delta_{\text{H}}$  = 8.51 (dt,  $J$  = 8.5, 1.0 Hz, 1 H), 8.48 (brs, 3 H), 8.37 (t,  $J$  = 6.5 Hz, 1 H), 8.25 (d,  $J$  = 8.5 Hz, 1 H), 8.11 (dd,  $J$  = 7.2, 1.0 Hz, 1 H), 7.67 (dd,  $J$  = 8.8, 7.2 Hz, 1 H), 7.63 (dd,  $J$  = 8.5, 7.5 Hz, 1 H), 7.31 (dd,  $J$  = 8.0, 1.0 Hz, 1 H), 4.09 (m, 1 H), 3.60 (s, 3 H), 3.26 (ddd,  $J$  = 14.5, 7.0, 5.5 Hz, 1 H), 3.18 (dt,  $J$  = 14.5, 6.0 Hz, 1 H), 2.85 (s, 6 H) ppm;  $^{13}\text{C}$  NMR (125 MHz,  $d_6$ -DMSO):  $\delta_{\text{C}}$  = 167.8, 158.4 (q,  $J$  = 36.5 Hz), 151.2, 134.9, 129.9, 129.1, 128.9, 128.7, 128.2, 123.7, 119.1, 116.8, 115.5, 114.5, 52.9, 52.3, 45.1, 42.3 ppm. HRMS (ESI-FT): calcd for  $\text{C}_{16}\text{H}_{22}\text{N}_3\text{O}_4\text{S}$  (M+1) 352.1326, found 352.1328.

**Compound 3.**  $^1\text{H}$  NMR (500 MHz,  $d_6$ -DMSO):  $\delta_{\text{H}}$  = 8.51 (dd,  $J$  = 8.0, 1.0 Hz, 1 H), 8.48 (brs, 3 H), 8.34 (t,  $J$  = 6.2 Hz, 1 H), 8.28 (d,  $J$  = 8.5 Hz, 1 H), 8.12 (dd,  $J$  = 7.0, 1.0 Hz, 1 H), 7.67 (dd,  $J$  = 8.8, 7.2 Hz, 1 H), 7.63 (dd,  $J$  = 8.5, 7.5 Hz, 1 H), 7.32 (d,  $J$  = 7.5 Hz, 1 H), 4.11 (dq,  $J$  = 11.0, 7.0 Hz, 1 H), 4.08 (m, 1 H),

4.00 (dq,  $J = 11.0, 7.0$  Hz, 1 H), 3.27 (ddd,  $J = 14.5, 6.5, 5.5$  Hz, 1 H), 3.19 (dt,  $J = 14.5, 5.5$  Hz, 1 H), 2.86 (s, 6 H), 1.15 (t,  $J = 7.0$  Hz, 3 H) ppm;  $^{13}\text{C}$  NMR (125 MHz, d6-DMSO):  $\delta_{\text{C}} = 167.4, 158.6$  (q,  $J = 36.5$  Hz), 151.0, 135.0, 129.9, 129.1, 129.0, 128.8, 128.2, 123.8, 119.3, 116.8, 115.6, 62.1, 52.3, 45.2, 42.4, 13.8 ppm. HRMS (ESI-FT): calcd for  $\text{C}_{17}\text{H}_{24}\text{N}_3\text{O}_4\text{S}$  (M+1) 366.1482, found 366.1481.

**Boc-DanAla-OBn.**  $^1\text{H}$  NMR (500 MHz,  $\text{CDCl}_3$ ):  $\delta_{\text{H}} = 8.53$  (d,  $J = 8.5$  Hz, 1 H), 8.22-8.20 (m, 2 H), 7.53 (t,  $J = 8.0$  Hz, 1 H), 7.48 (d,  $J = 8.0$  Hz, 1 H), 7.35-7.32 (m, 3 H), 7.27-7.26 (m, 2 H), 7.17 (d,  $J = 7.5$  Hz, 1 H), 5.41 (brs, 2 H), 5.08 (d,  $J = 12.0$  Hz, 1 H), 4.97 (d,  $J = 12.0$  Hz, 1 H), 4.31 (brs, 1 H), 3.32-3.30 (m, 2 H), 2.86 (s, 6 H), 1.38 (s, 6 H) ppm;  $^{13}\text{C}$  NMR (125 MHz,  $\text{CDCl}_3$ ):  $\delta_{\text{C}} = 170.0, 155.3, 152.0, 134.9, 134.2, 130.7, 129.9, 129.8, 129.5, 128.6, 128.5$  (2), 128.3, 123.1, 118.6, 115.3, 80.4, 77.2, 67.6, 53.6, 45.4, 28.2 ppm.

**Compound 9.**  $^1\text{H}$  NMR (500 MHz,  $\text{CDCl}_3$ ):  $\delta_{\text{H}} = 8.57$  (d,  $J = 8.5$  Hz, 1 H), 8.37 (d,  $J = 7.5$  Hz, 1 H), 7.81 (d,  $J = 9.0$  Hz, 1 H), 7.53 (t,  $J = 8.0$  Hz, 2 H), 7.41-7.32 (m, 5 H), 7.16 (d,  $J = 8.0$  Hz, 1 H), 5.51 (d,  $J = 9.0$  Hz, 1 H), 5.26 (d,  $J = 12.5$  Hz, 1 H), 5.17 (d,  $J = 12.5$  Hz, 1 H), 4.85 (dd,  $J = 13.2, 7.8$  Hz, 1 H), 4.45 (dd,  $J = 14.0, 5.0$  Hz, 1 H), 4.38 (dd,  $J = 14.2, 7.8$  Hz, 1 H), 2.87 (s, 6 H), 1.47 (s, 9 H), 1.13 (s, 9 H) ppm;  $^{13}\text{C}$  NMR (125 MHz,  $\text{CDCl}_3$ ):  $\delta_{\text{C}} = 170.4, 155.2, 152.0, 150.6, 135.3, 134.8, 131.9, 131.1, 129.6, 129.3, 128.7, 128.5, 128.4, 128.3, 122.8, 117.7, 115.1, 84.8, 80.0, 77.2, 67.5, 52.8, 47.3, 45.3, 28.3, 27.6$  ppm;

**Compound 10.**  $^1\text{H}$  NMR (500 MHz,  $\text{CDCl}_3$ ):  $\delta_{\text{H}} = 8.57$  (d,  $J = 8.5$  Hz, 1 H), 8.37 (d,  $J = 7.5$  Hz, 1 H), 7.83 (d,  $J = 8.5$  Hz, 1 H), 7.55 (dd,  $J = 16.8, 8.2$  Hz, 2 H), 7.17 (d,  $J = 8.0$  Hz, 1 H), 5.59 (d,  $J = 8.5$  Hz, 1 H), 4.84-4.83 (m, 1 H), 4.44-4.41 (m, 2 H), 2.88 (s, 6 H), 1.49 (s, 9 H), 1.17 (s, 9H) ppm;  $^{13}\text{C}$  NMR (125 MHz,  $\text{CDCl}_3$ ):  $\delta_{\text{C}} = 156.0, 151.9, 150.8, 134.7, 132.0, 131.2, 129.6, 129.4, 128.8, 122.8, 117.8, 115.2, 85.1, 80.6, 77.2, 47.0, 45.4, 28.3, 27.6$  ppm;

**Compound 11.**  $^1\text{H}$  NMR (500 MHz,  $\text{CDCl}_3$ ):  $\delta_{\text{H}} = 8.58$  (d,  $J = 8.0$  Hz, 1 H), 8.36 (d,  $J = 7.0$  Hz, 1 H), 7.79 (d,  $J = 9.0$  Hz, 1 H), 7.55 (dd,  $J = 16.0, 8.5$  Hz, 2 H), 7.17 (d, 7.5 Hz, 1 H), 5.84-5.81 (m, 2 H), 5.51 (d,  $J = 8.5$  Hz, 1 H), 4.82 (dd,  $J = 12.8, 7.2$  Hz, 1 H), 4.46 (dd,  $J = 14.5, 4.8$  Hz, 1 H), 4.39 (dd,  $J = 14.5, 7.5$  Hz, 1 H), 2.88 (s, 6 H), 2.13 (s, 3 H), 1.48 (s, 9 H), 1.14 (s, 9 H) ppm;  $^{13}\text{C}$  NMR (125 MHz,  $\text{CDCl}_3$ ):  $\delta_{\text{C}} = 169.5, 169.4, 155.1, 152.0, 150.6, 134.7, 132.0, 131.2, 129.6, 129.3, 128.8, 122.8, 117.7, 115.2, 85.0, 80.2, 79.9, 77.2, 52.7, 47.0, 45.3, 28.3, 27.5, 20.7$  ppm.

**Compound 4.**  $^1\text{H}$  NMR (500 MHz, d6-DMSO):  $\delta_{\text{H}} = 8.51$  (d,  $J = 8.5$  Hz, 1 H), 8.37 (t,  $J = 6.5$  Hz, 1 H), 8.26 (d,  $J = 8.5$  Hz, 1 H), 8.11 (dd,  $J = 7.2, 1.2$  Hz, 1 H), 7.67 (dd,  $J = 8.2, 7.8$  Hz, 1 H), 7.63 (dd,  $J = 8.5, 7.5$  Hz, 1 H), 7.32 (d,  $J = 8.0$  Hz, 1 H), 5.73 (d,  $J = 6.0$  Hz, 1 H), 5.59 (d,  $J = 5.5$  Hz, 1 H), 4.20 (t,  $J = 4.8$  Hz, 1 H), 3.27 (ddd,  $J = 14.5, 7.0, 5.5$  Hz, 1 H), 3.17 (dt,  $J = 14.5, 5.5$  Hz, 1 H), 2.85 (s, 6 H), 2.07 (s, 3 H) ppm;  $^{13}\text{C}$  NMR (125 MHz, d6-DMSO):  $\delta_{\text{C}} = 169.1, 166.7, 158.5$  (q,  $J = 36.1$  Hz), 151.1, 134.8, 129.9, 129.1, 128.9, 128.8, 128.2, 123.8, 119.1, 115.6, 79.8, 52.3, 45.2, 42.2, 20.5 ppm. LC-MS (ESI): (m/z) 410.2  $[\text{M}+\text{H}]^+$ . HRMS (ESI-FT): calcd for  $\text{C}_{18}\text{H}_{24}\text{N}_3\text{O}_6\text{S}$  (M+1) 410.1380, found 410.1382.

## NMR Spectra

|                                                                               |    |
|-------------------------------------------------------------------------------|----|
| <sup>1</sup> H NMR (500 MHz, CDCl <sub>3</sub> ) of Compound <b>6</b> .....   | 4  |
| <sup>13</sup> C NMR (125 MHz, CDCl <sub>3</sub> ) of Compound <b>6</b> .....  | 5  |
| <sup>1</sup> H NMR (500 MHz, CDCl <sub>3</sub> ) of Compound <b>7</b> .....   | 6  |
| <sup>13</sup> C NMR (125 MHz, CDCl <sub>3</sub> ) of Compound <b>7</b> .....  | 7  |
| <sup>1</sup> H NMR (500 MHz, d6-DMSO) of Compound <b>2</b> .....              | 8  |
| <sup>13</sup> C NMR (125 MHz, d6-DMSO) of Compound <b>2</b> .....             | 9  |
| <sup>1</sup> H NMR (500 MHz, d6-DMSO) of Compound <b>3</b> .....              | 10 |
| <sup>13</sup> C NMR (125 MHz, d6-DMSO) of Compound <b>3</b> .....             | 11 |
| <sup>1</sup> H NMR (500 MHz, CDCl <sub>3</sub> ) of Compound <b>8</b> .....   | 12 |
| <sup>13</sup> C NMR (125 MHz, CDCl <sub>3</sub> ) of Compound <b>8</b> .....  | 13 |
| <sup>1</sup> H NMR (500 MHz, CDCl <sub>3</sub> ) of Boc-DanAla-OBn.....       | 14 |
| <sup>13</sup> C NMR (125 MHz, CDCl <sub>3</sub> ) of Boc-DanAla-OBn.....      | 15 |
| <sup>1</sup> H NMR (500 MHz, CDCl <sub>3</sub> ) of Compound <b>9</b> .....   | 16 |
| <sup>13</sup> C NMR (125 MHz, CDCl <sub>3</sub> ) of Compound <b>9</b> .....  | 17 |
| <sup>1</sup> H NMR (500 MHz, CDCl <sub>3</sub> ) of Compound <b>10</b> .....  | 18 |
| <sup>13</sup> C NMR (125 MHz, CDCl <sub>3</sub> ) of Compound <b>10</b> ..... | 19 |
| <sup>1</sup> H NMR (500 MHz, CDCl <sub>3</sub> ) of Compound <b>11</b> .....  | 20 |
| <sup>13</sup> C NMR (125 MHz, CDCl <sub>3</sub> ) of Compound <b>11</b> ..... | 21 |
| <sup>1</sup> H NMR (500 MHz, d6-DMSO) of Compound <b>4</b> .....              | 22 |
| <sup>13</sup> C NMR (125 MHz, d6-DMSO) of Compound <b>4</b> .....             | 23 |

<sup>1</sup>H NMR (500 MHz, CDCl<sub>3</sub>) of Compound 6

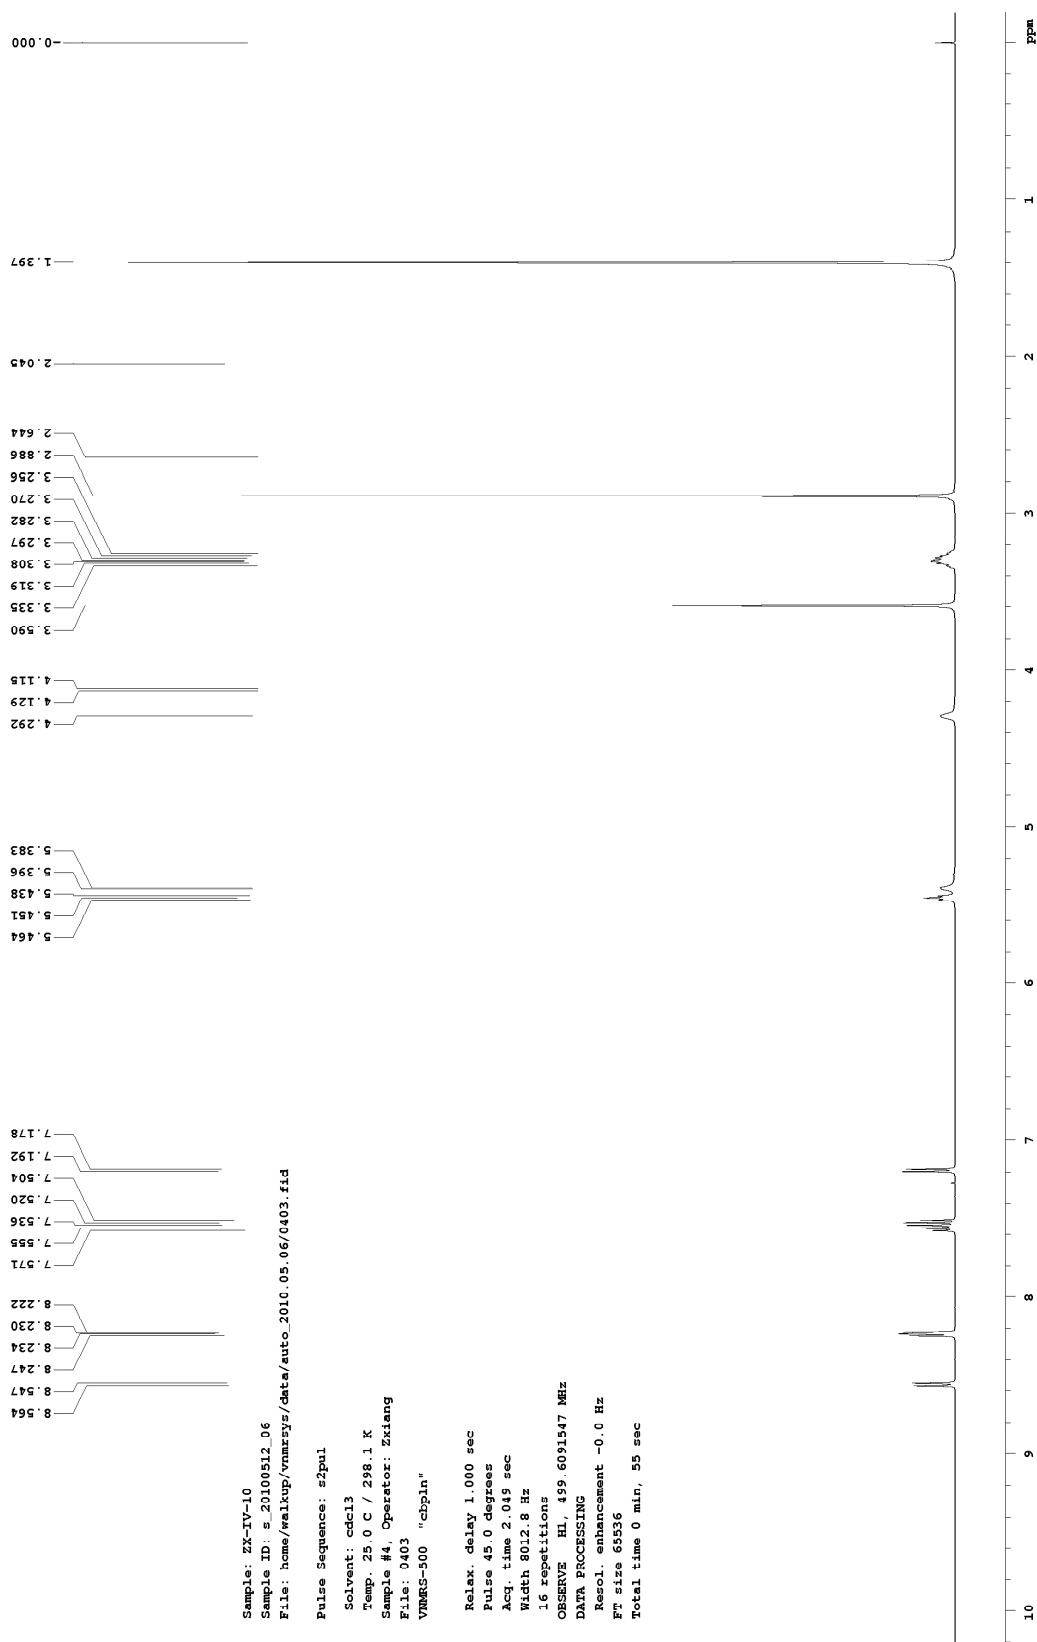

<sup>13</sup>C NMR (125 MHz, CDCl<sub>3</sub>) of Compound 6

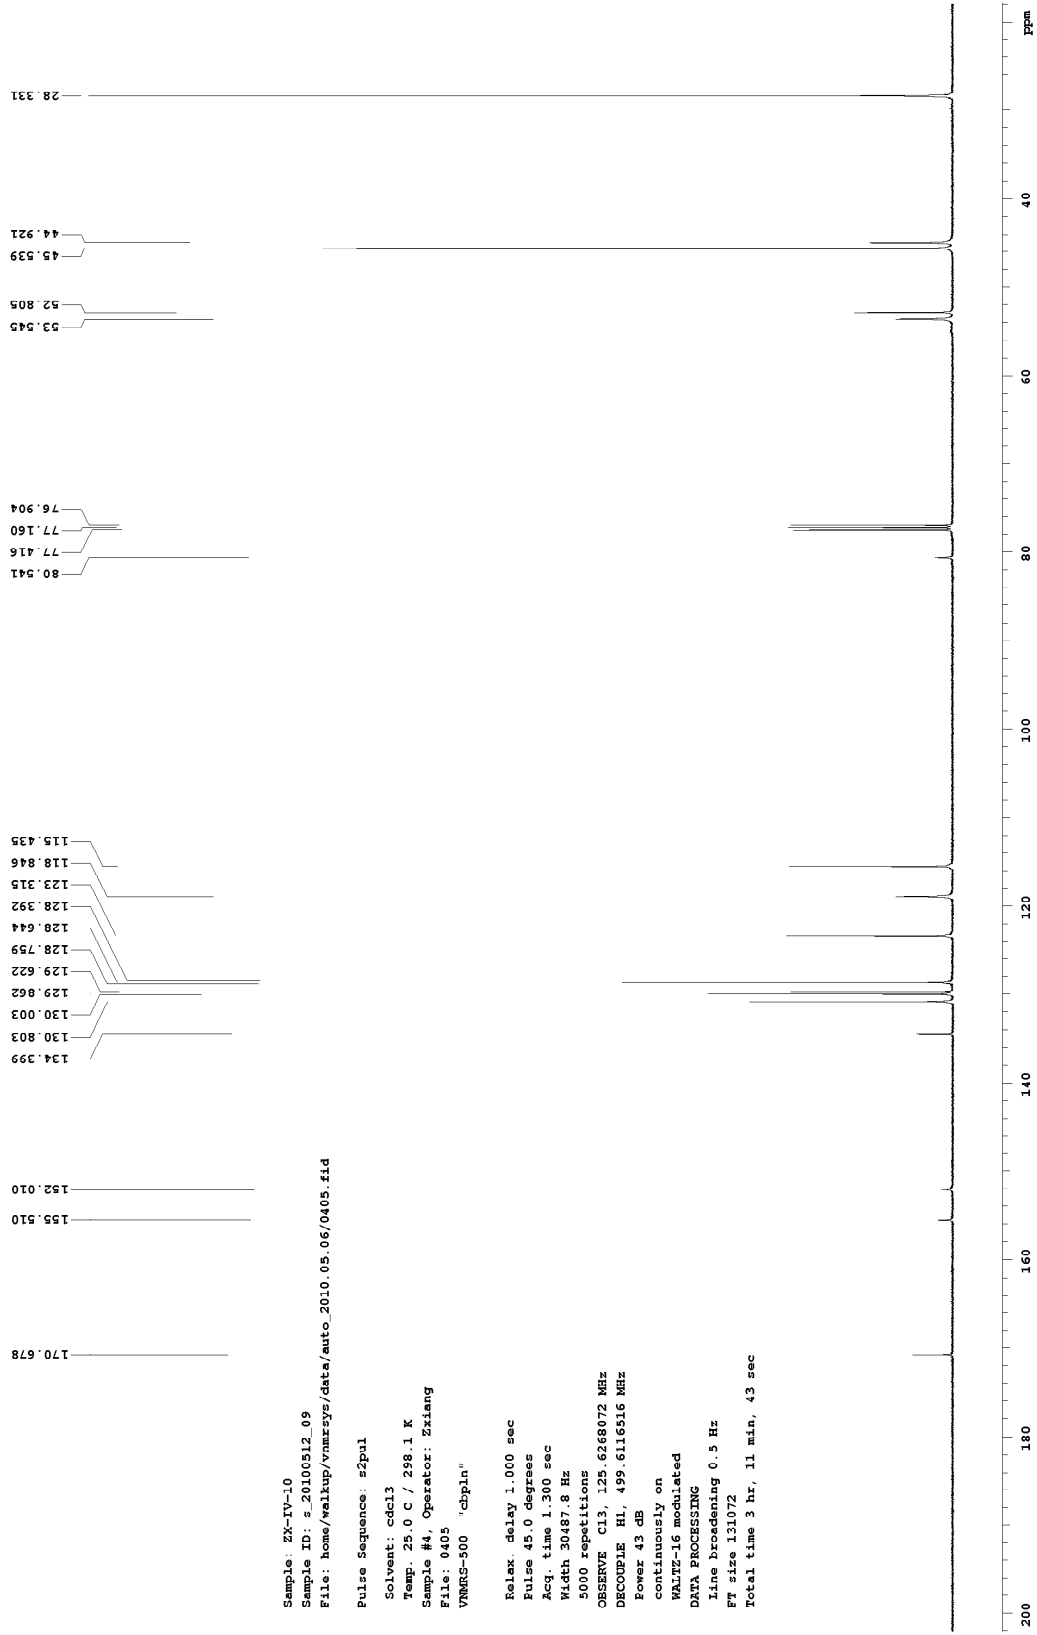

<sup>1</sup>H NMR (500 MHz, CDCl<sub>3</sub>) of Compound 7

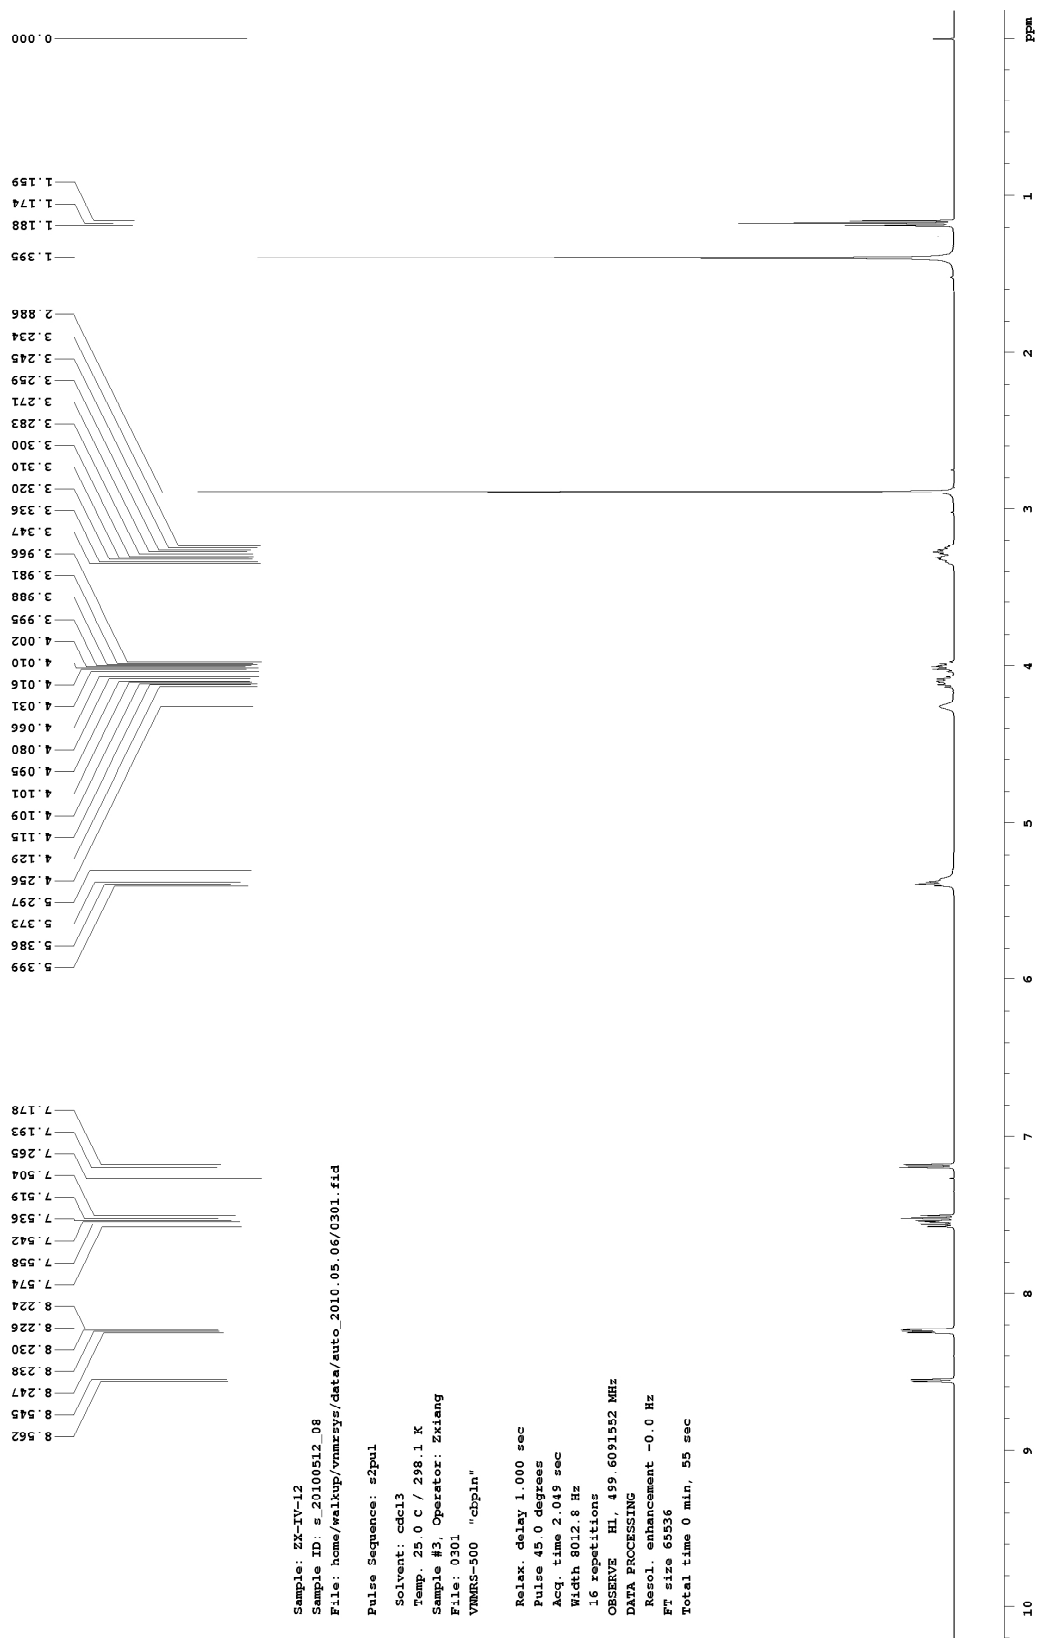

<sup>13</sup>C NMR (125 MHz, CDCl<sub>3</sub>) of Compound 7

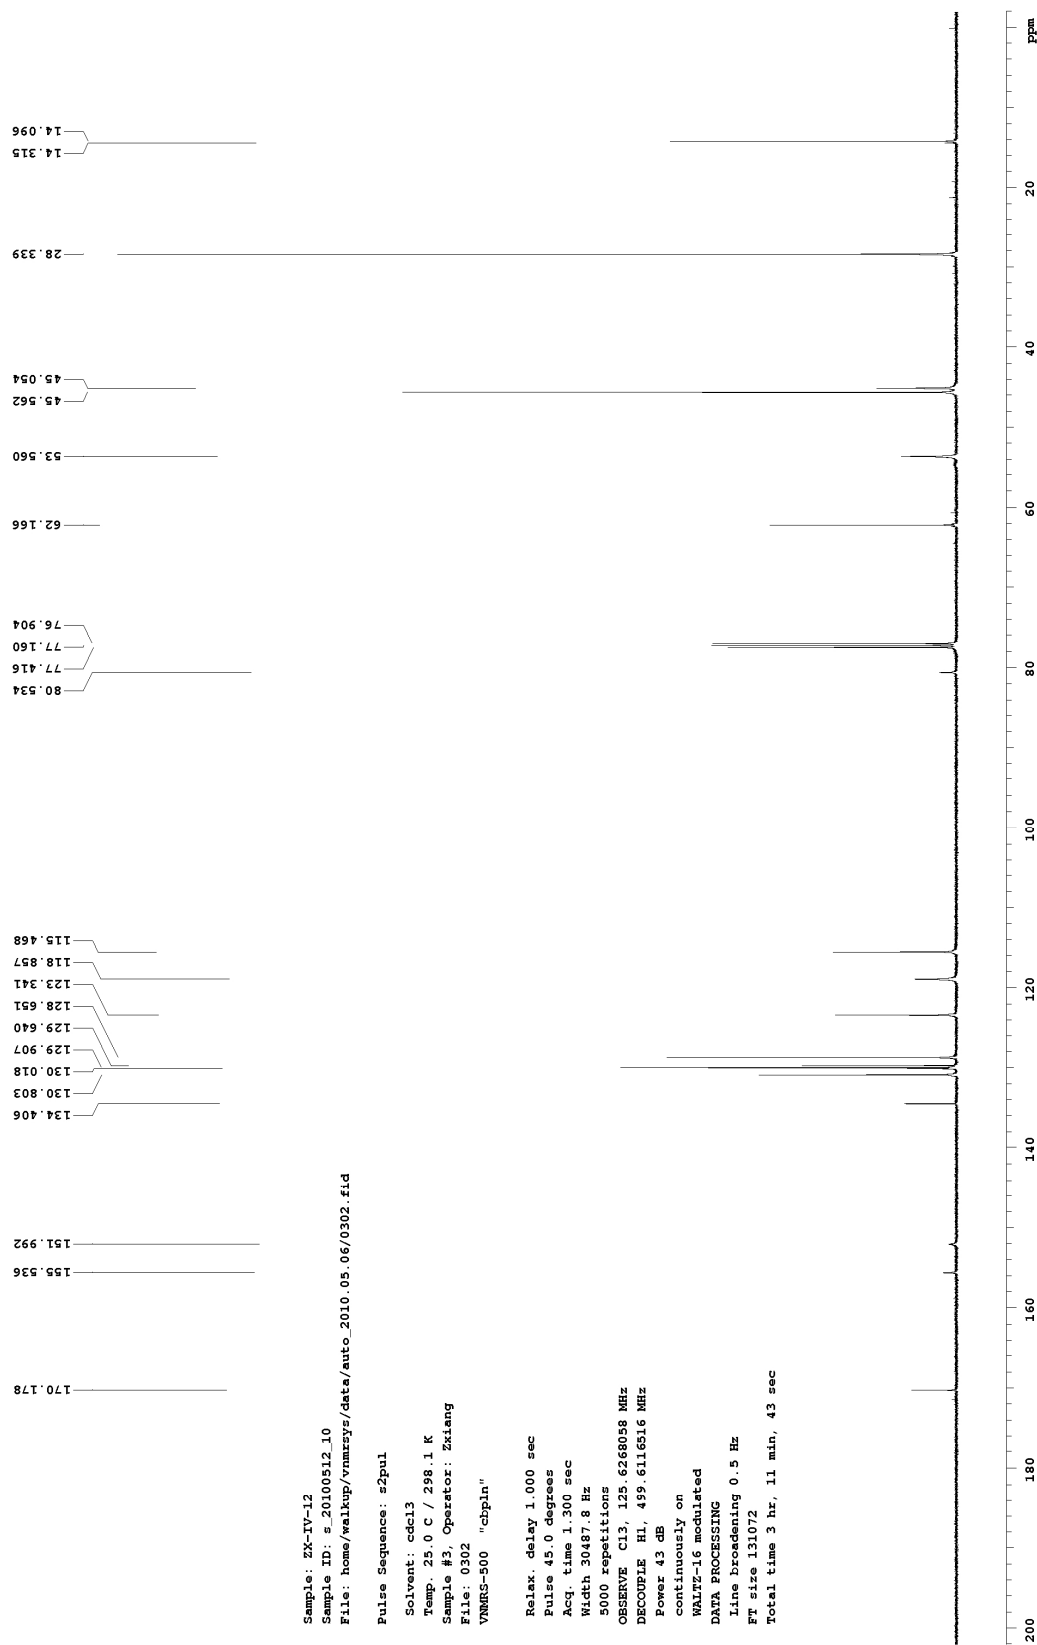

<sup>1</sup>H NMR (500 MHz, d6-DMSO) of Compound 2

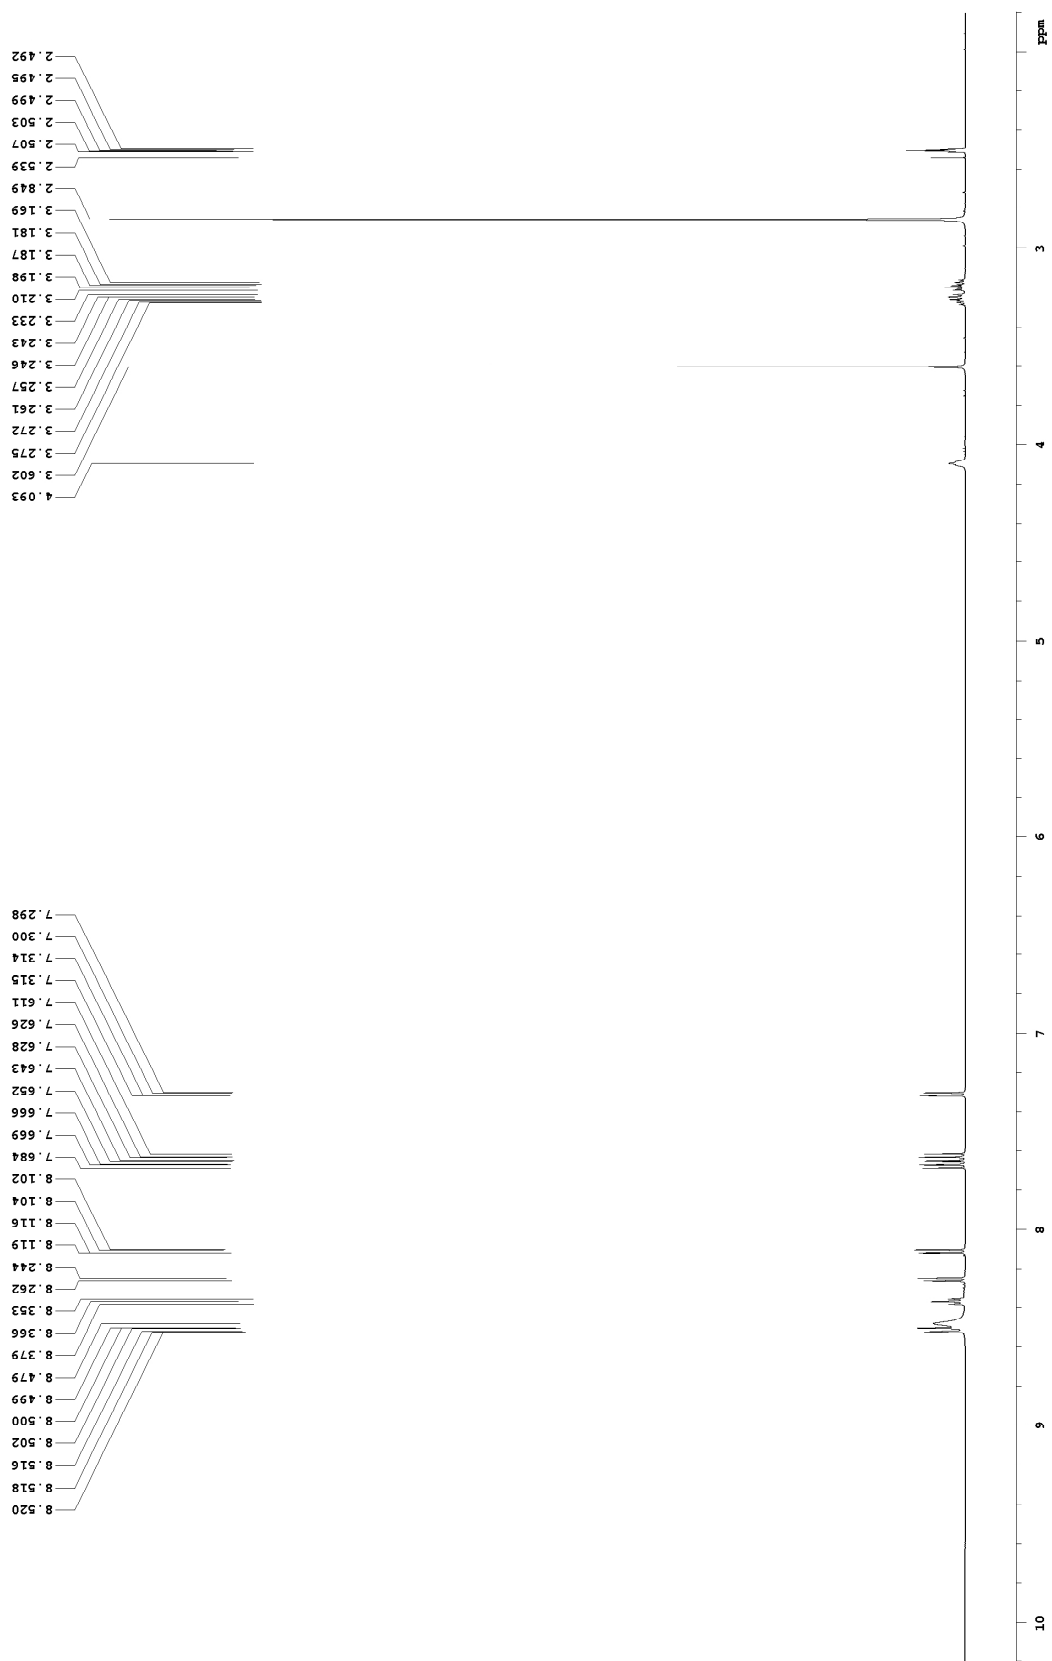



<sup>13</sup>C NMR (125 MHz, d6-DMSO) of Compound 2

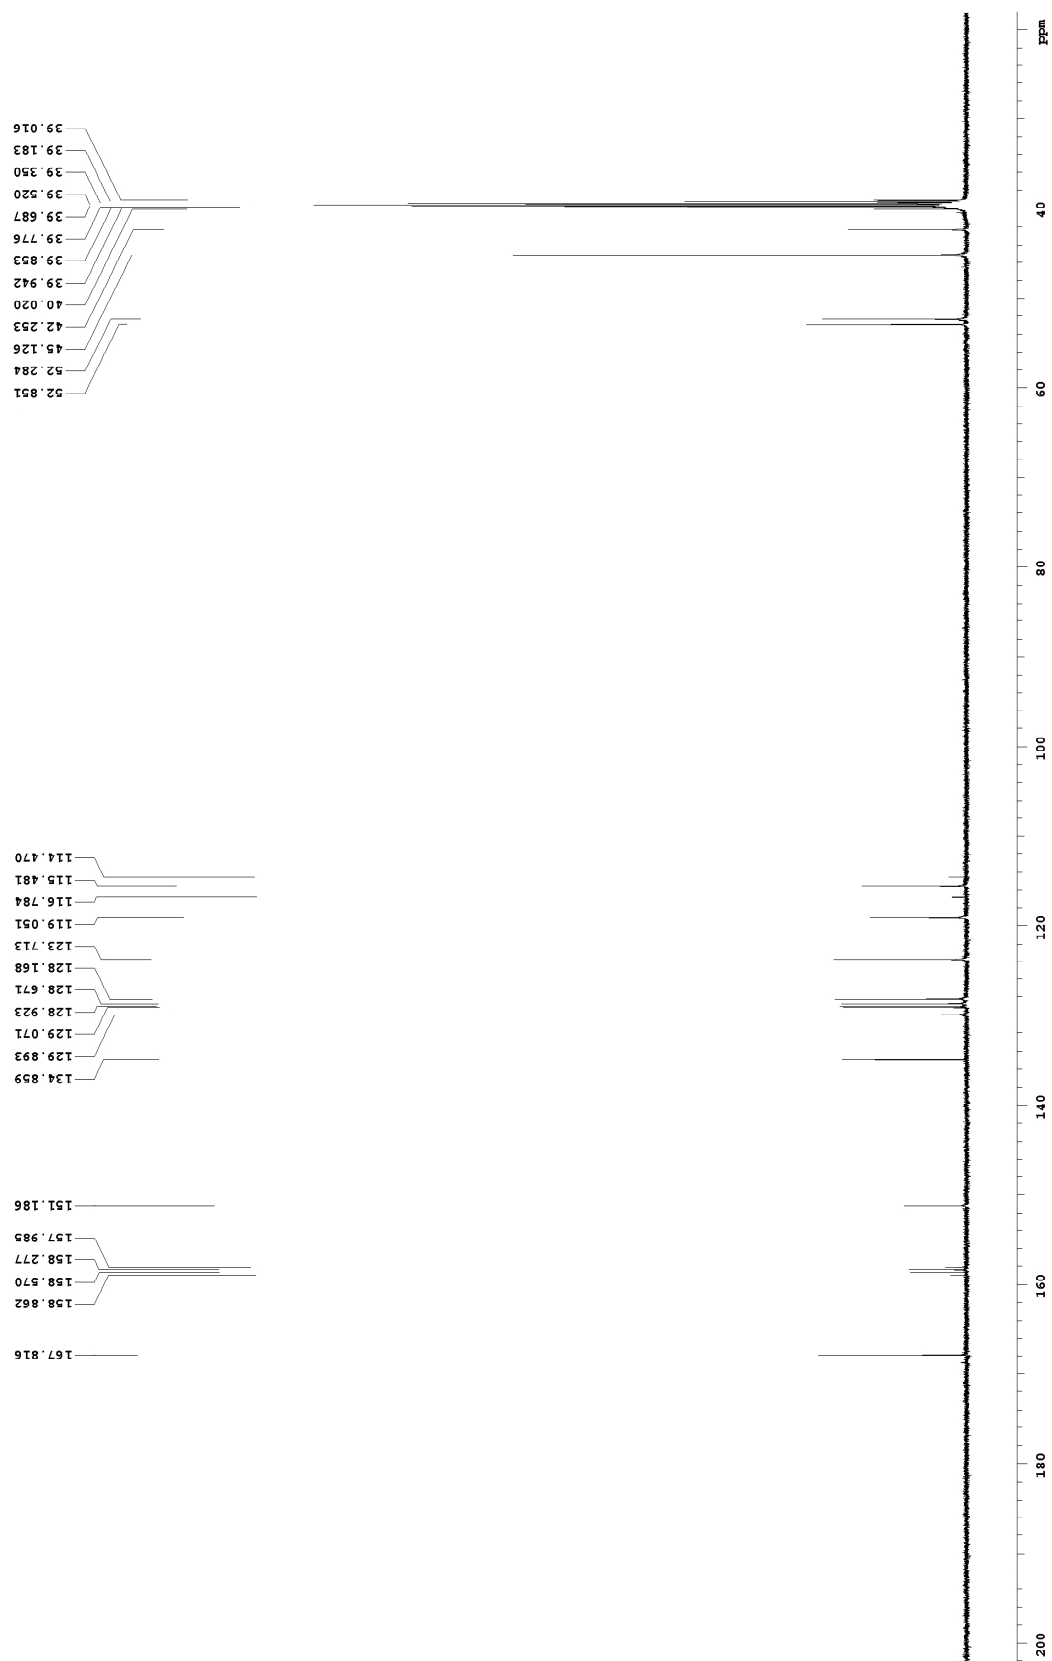

<sup>1</sup>H NMR (500 MHz, d6-DMSO) of Compound 3

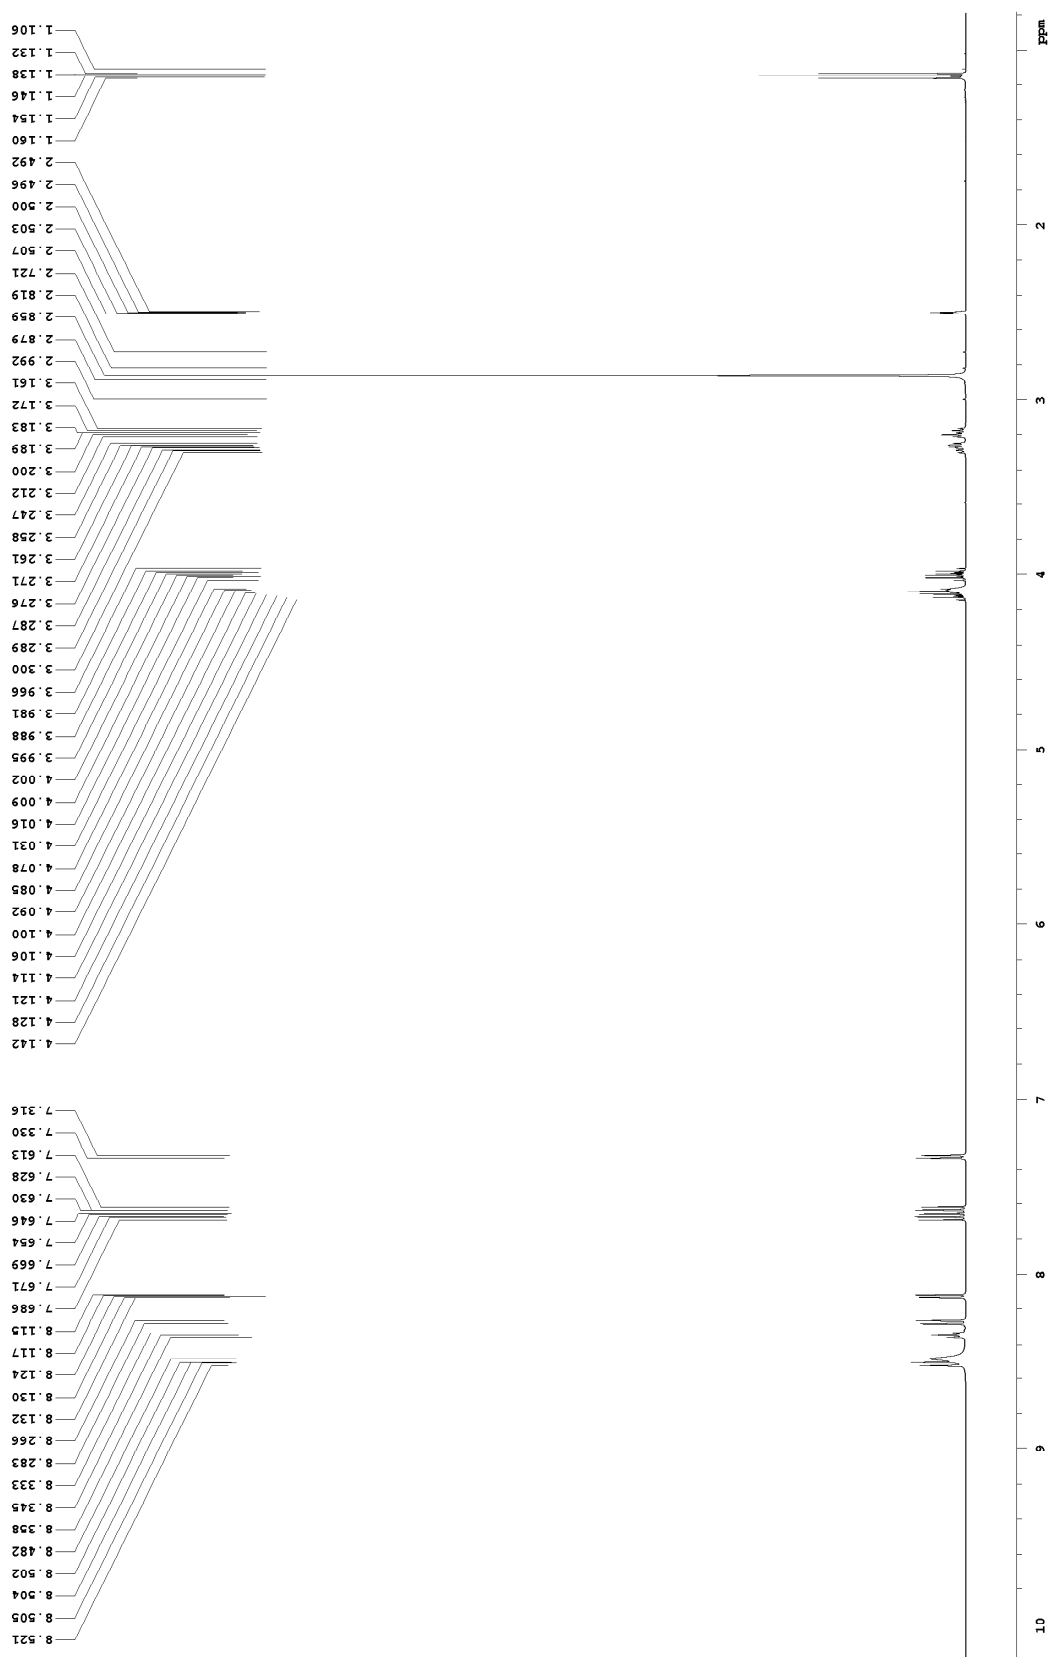

<sup>13</sup>C NMR (125 MHz, d6-DMSO) of Compound 3

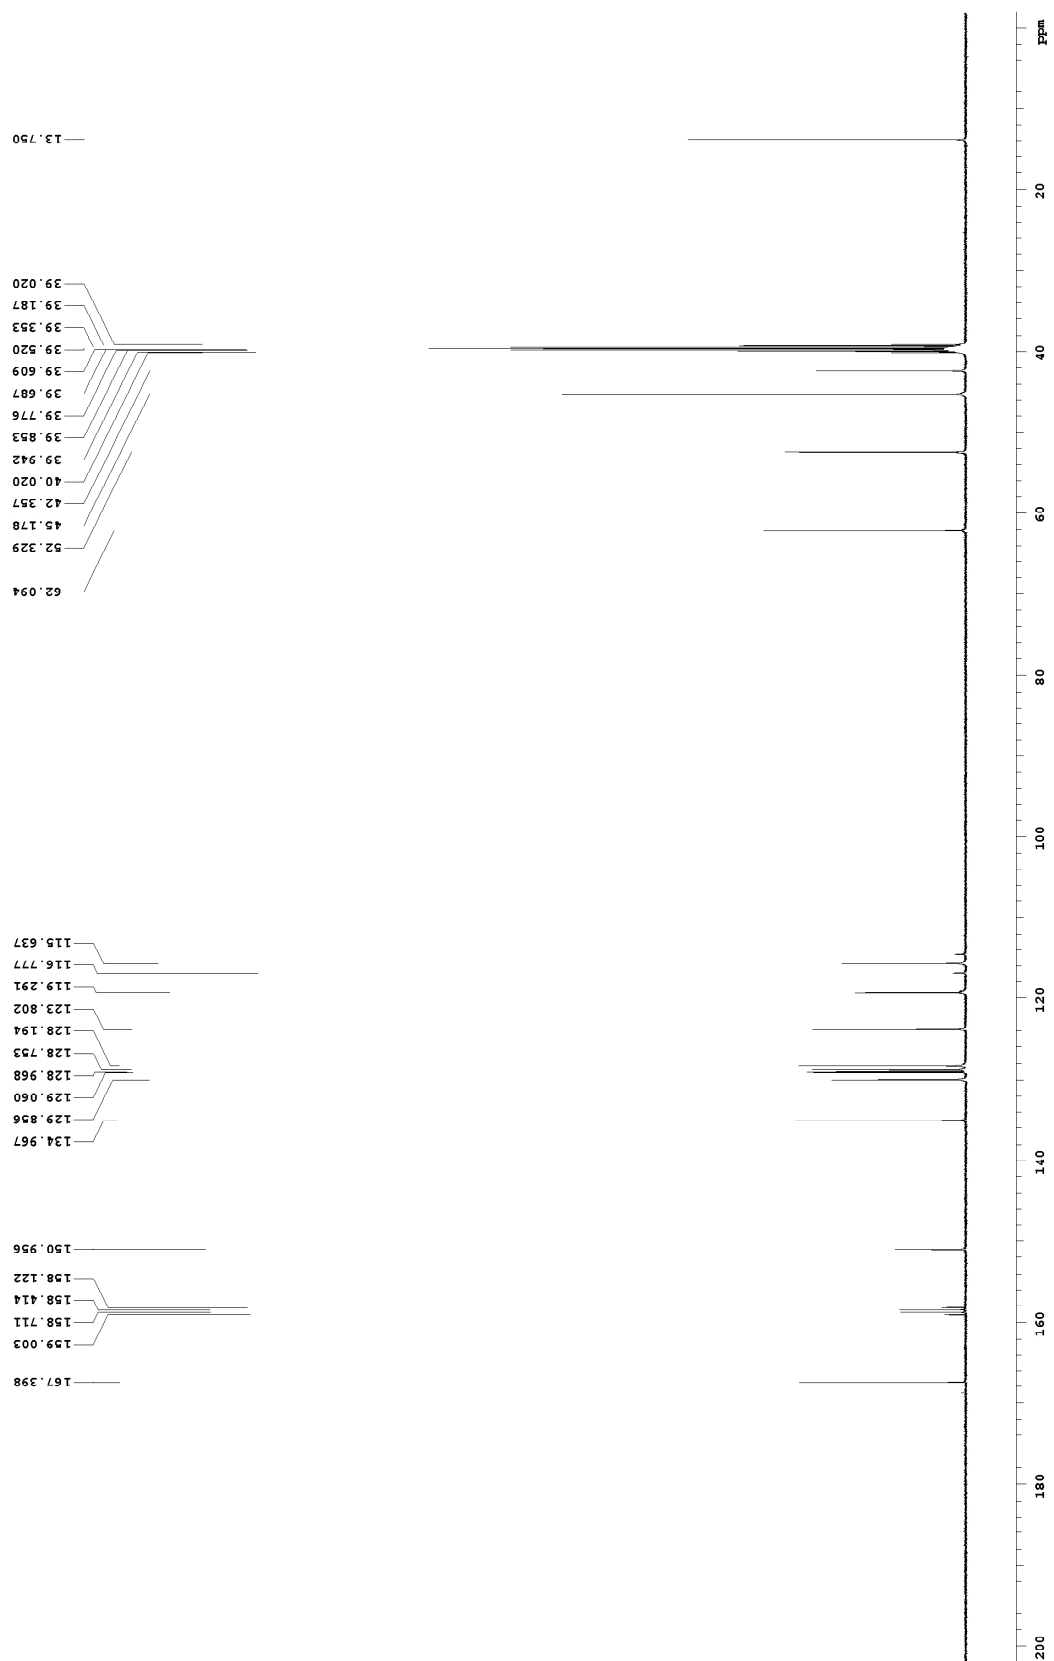

<sup>1</sup>H NMR (500 MHz, CDCl<sub>3</sub>) of Compound 8

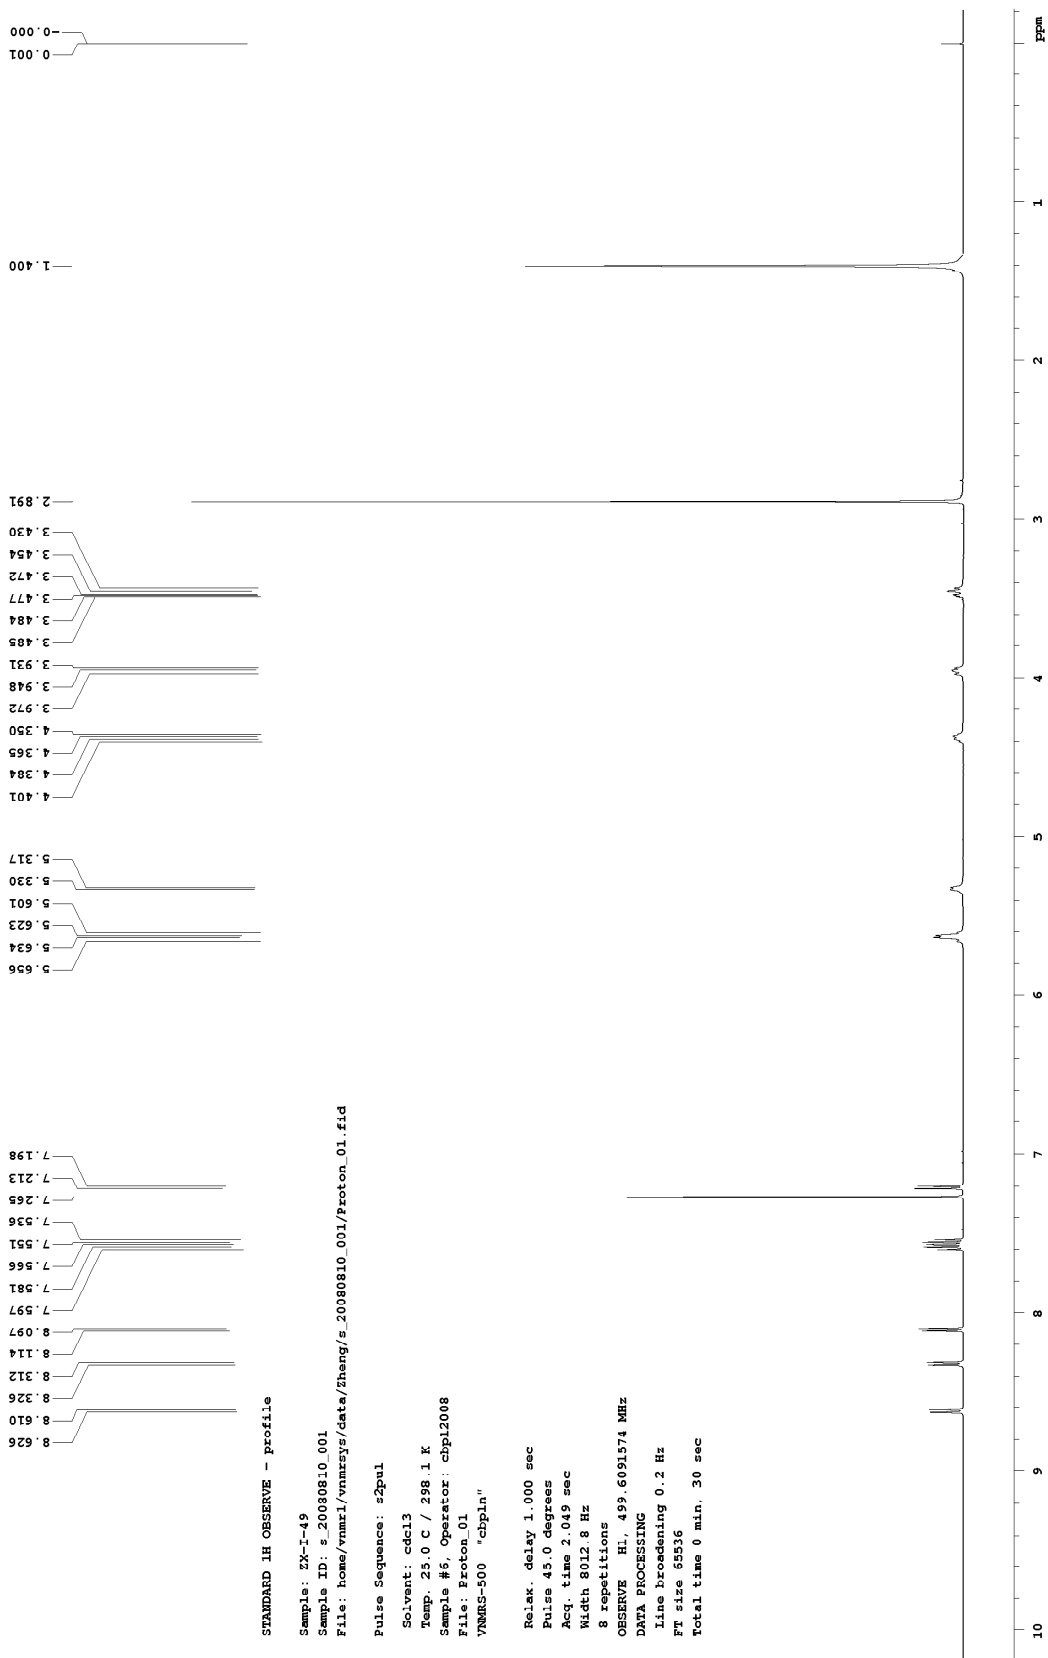

<sup>13</sup>C NMR (125 MHz, CDCl<sub>3</sub>) of Compound 8

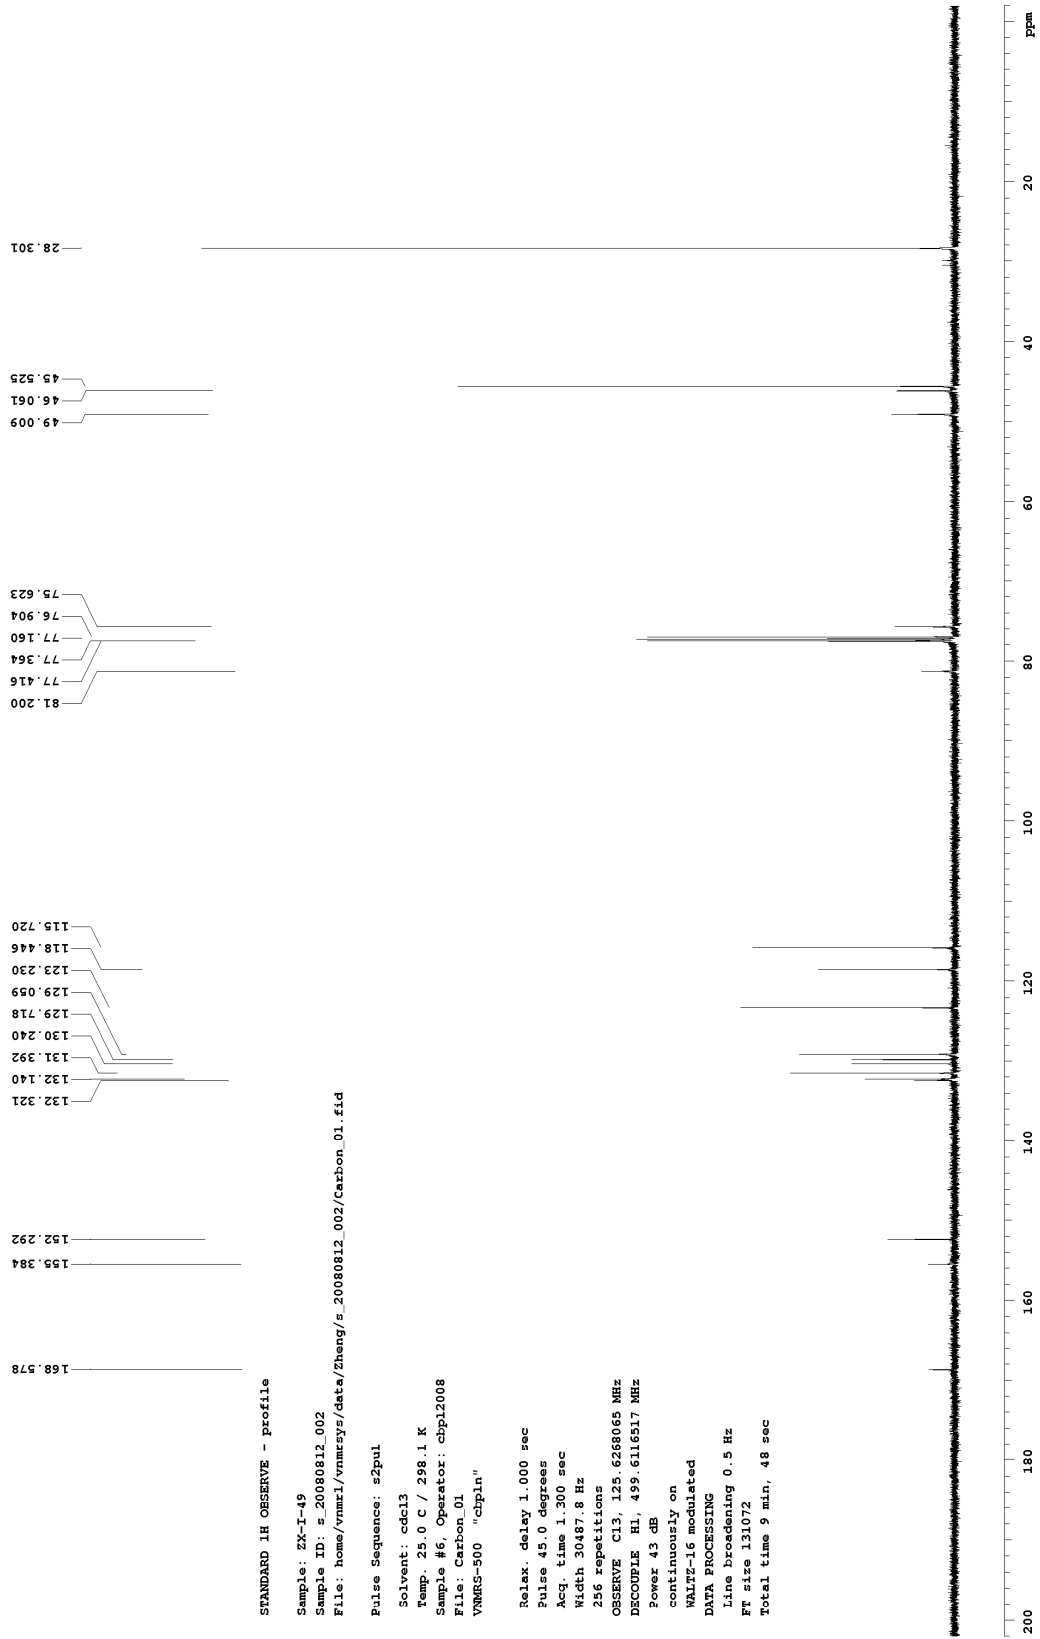

$^1\text{H}$  NMR (500 MHz,  $\text{CDCl}_3$ ) of Boc-DanAla-OBn

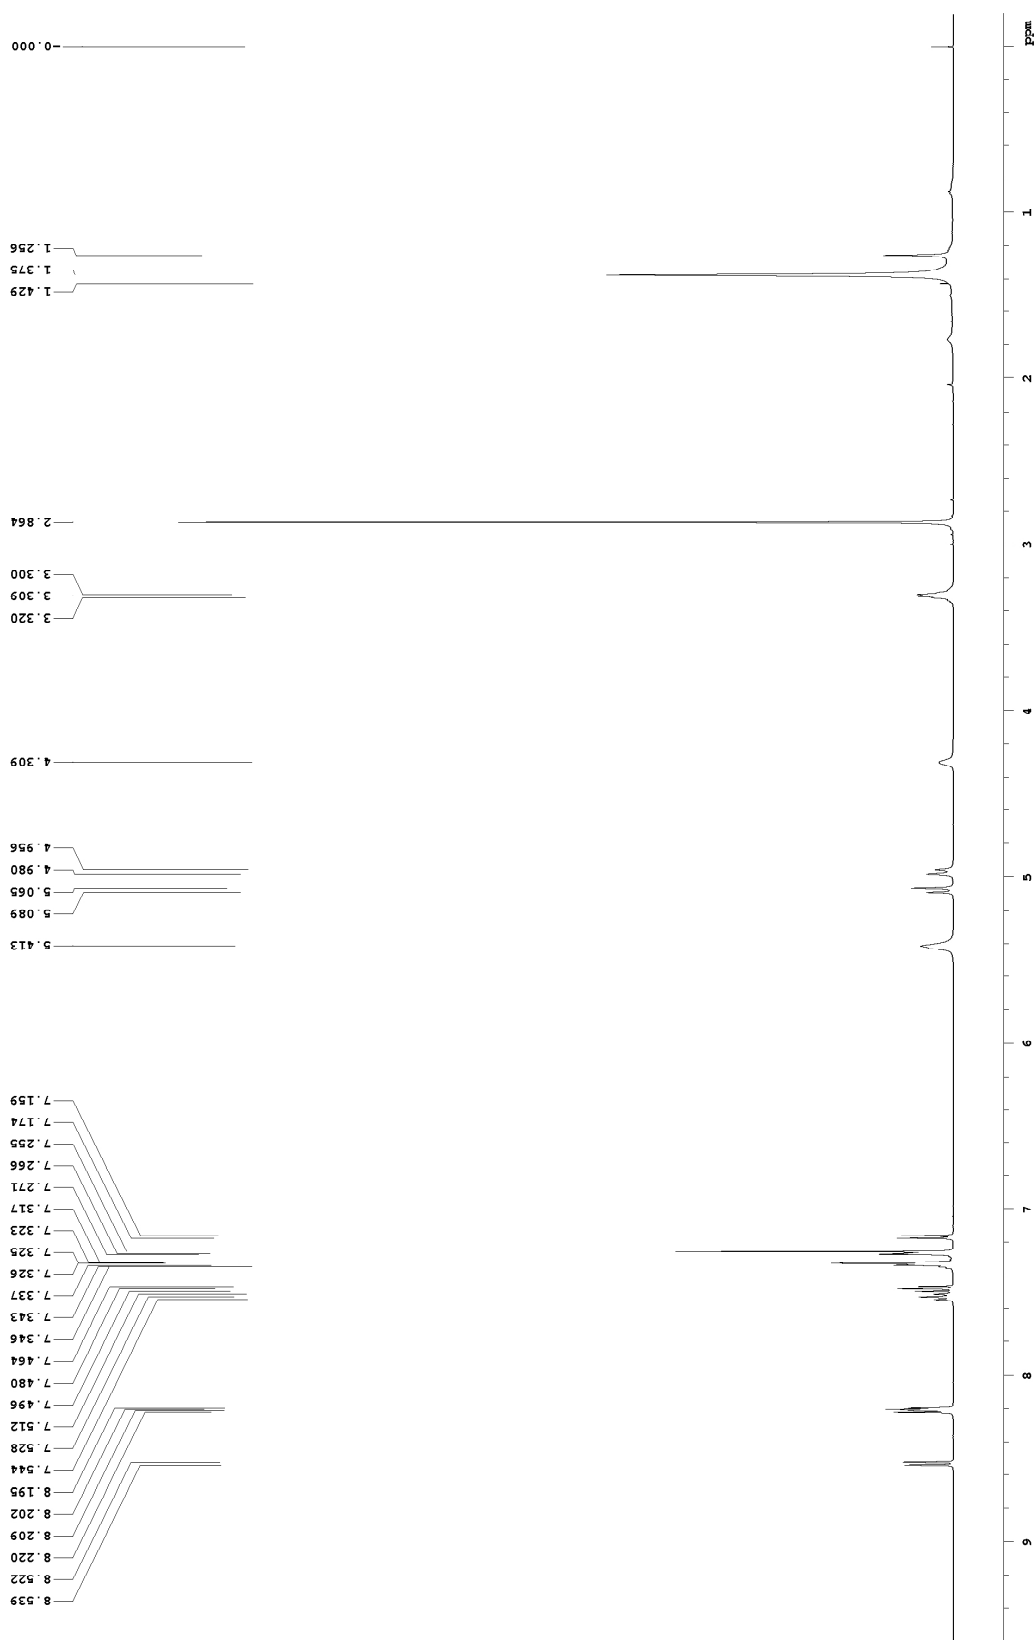

<sup>13</sup>C NMR (125 MHz, CDCl<sub>3</sub>) of Boc-DanAla-OBn

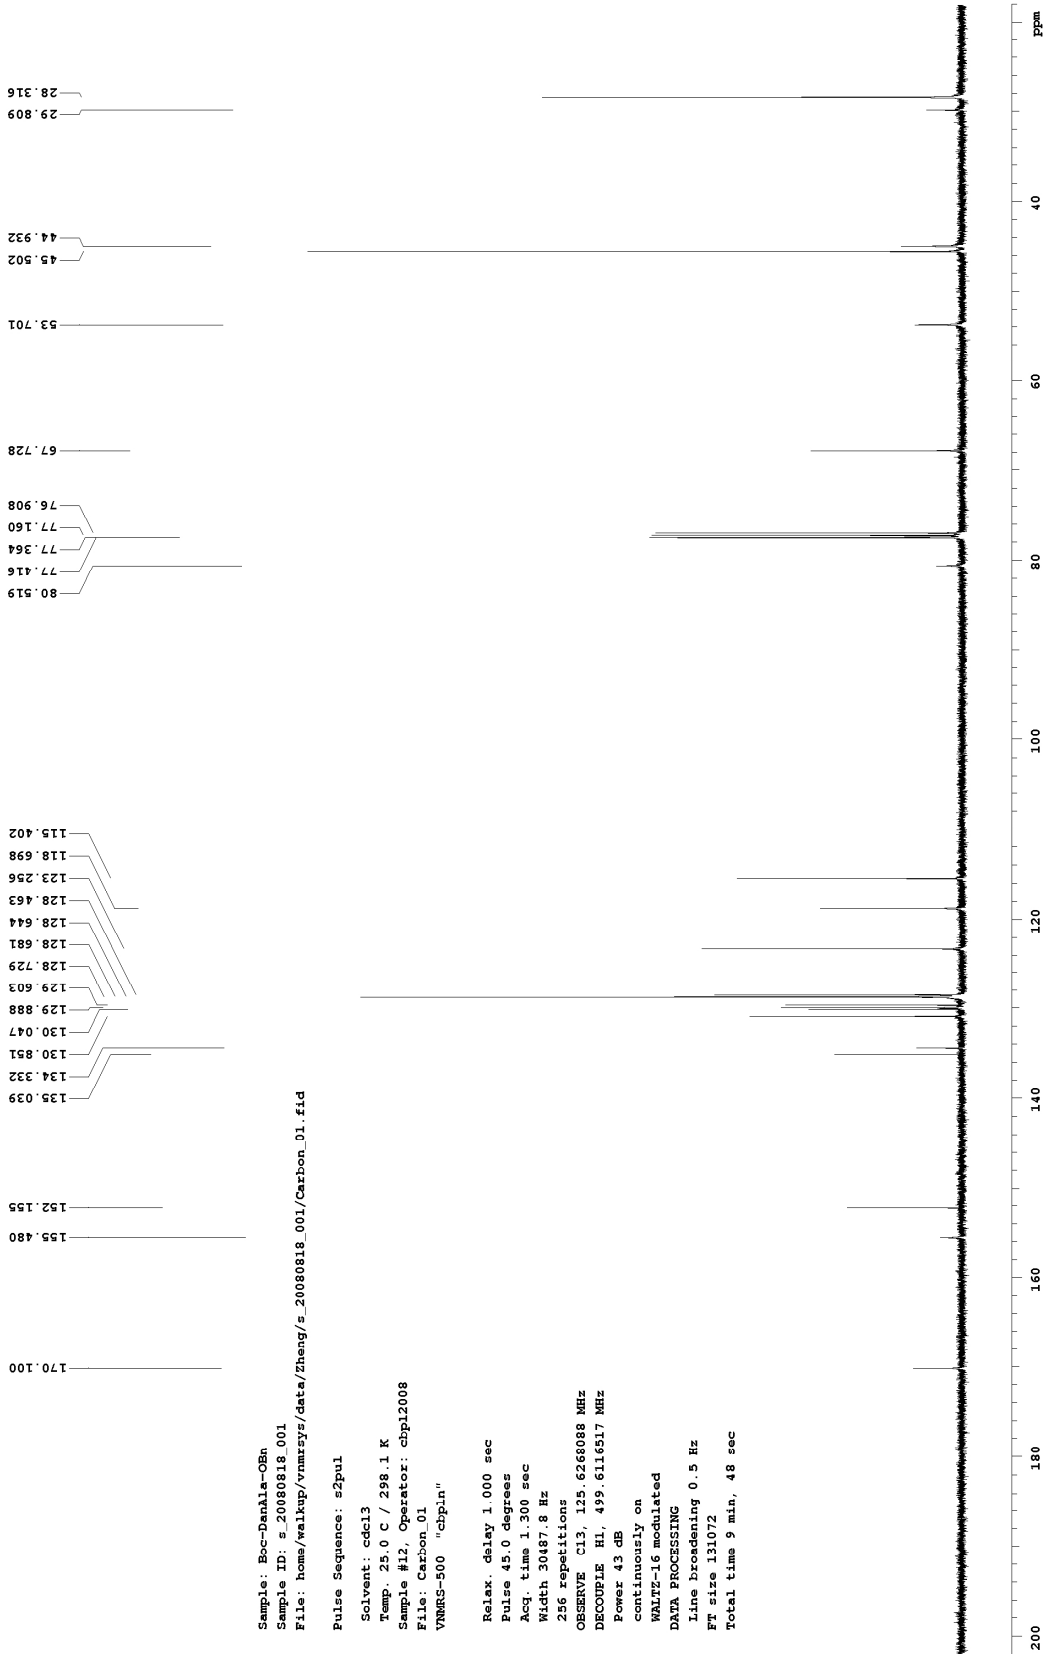

<sup>1</sup>H NMR (500 MHz, CDCl<sub>3</sub>) of Compound 9

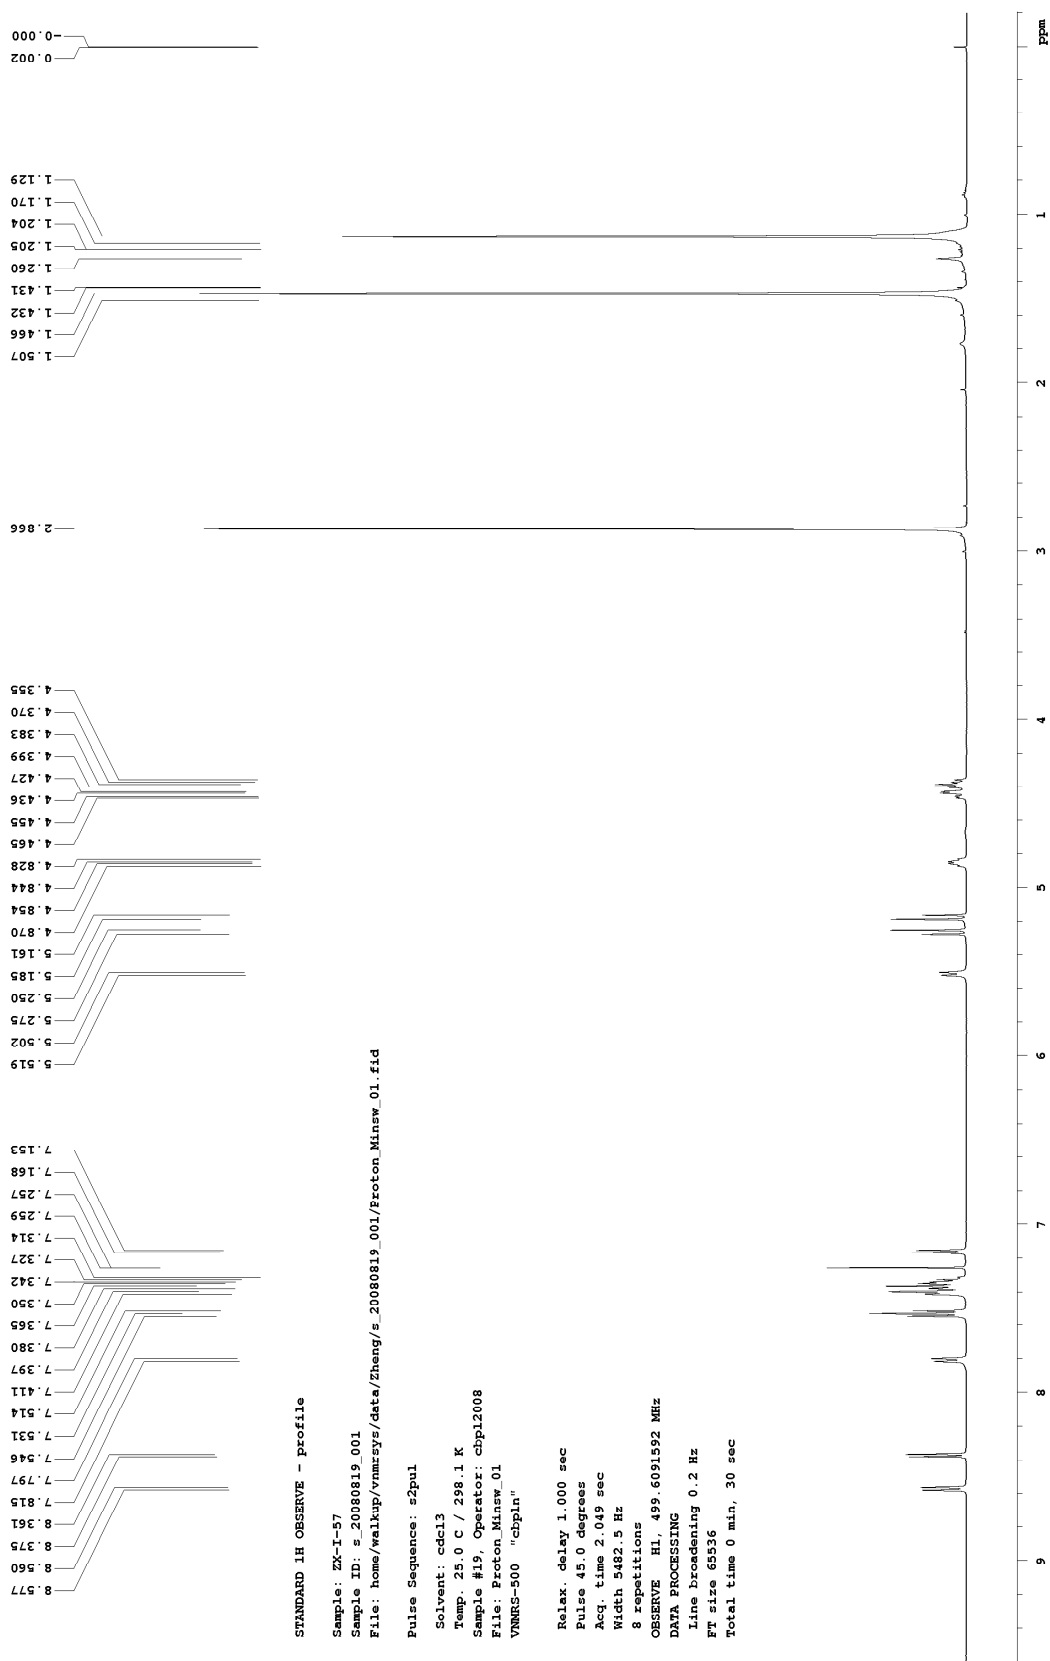



<sup>13</sup>C NMR (125 MHz, CDCl<sub>3</sub>) of Compound 9

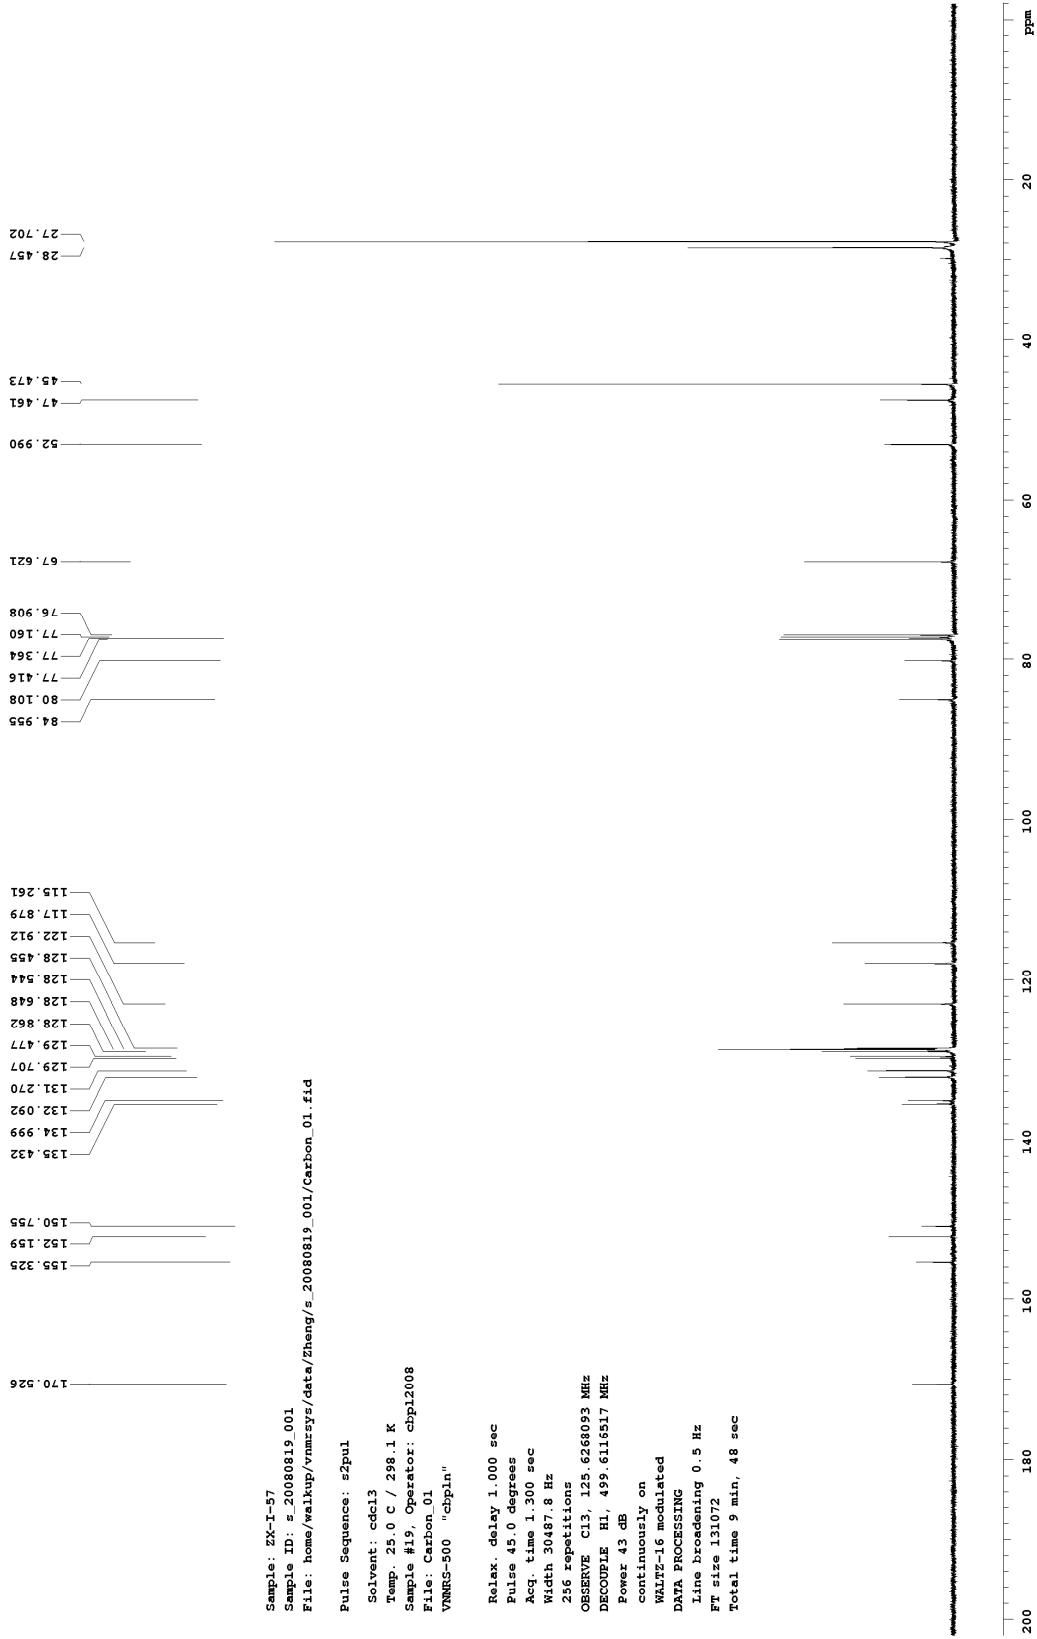

<sup>1</sup>H NMR (500 MHz, CDCl<sub>3</sub>) of Compound 10

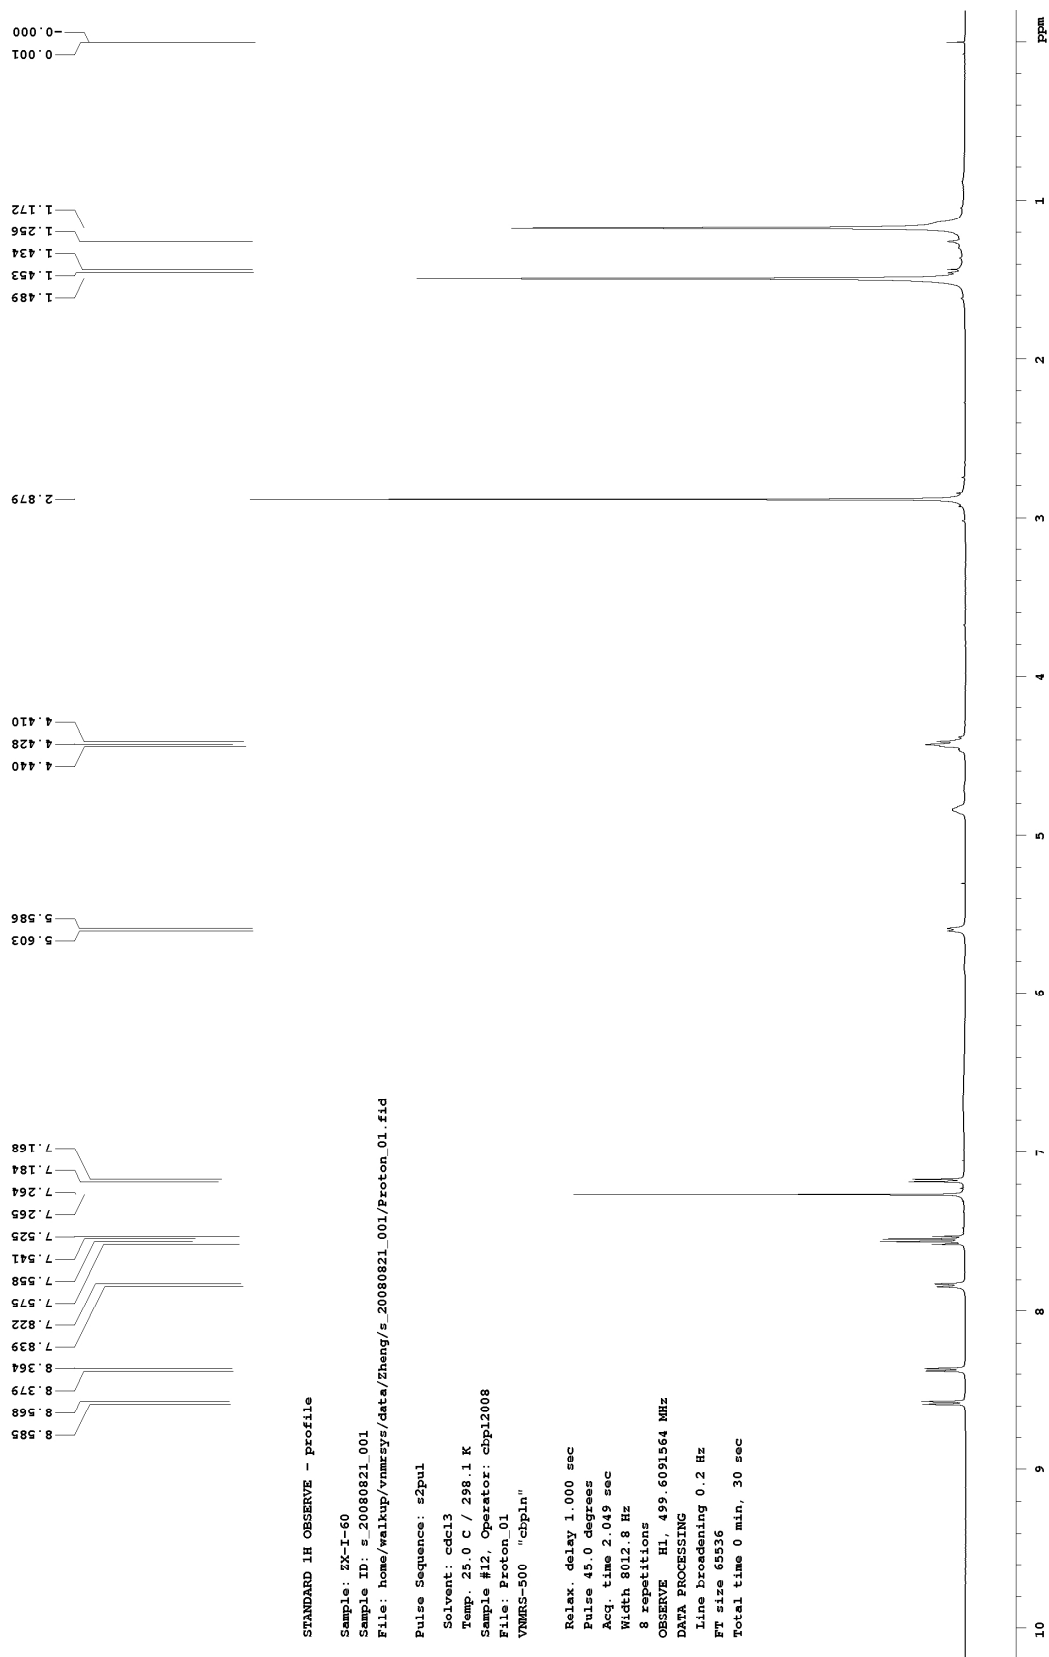

<sup>13</sup>C NMR (125 MHz, CDCl<sub>3</sub>) of Compound 10

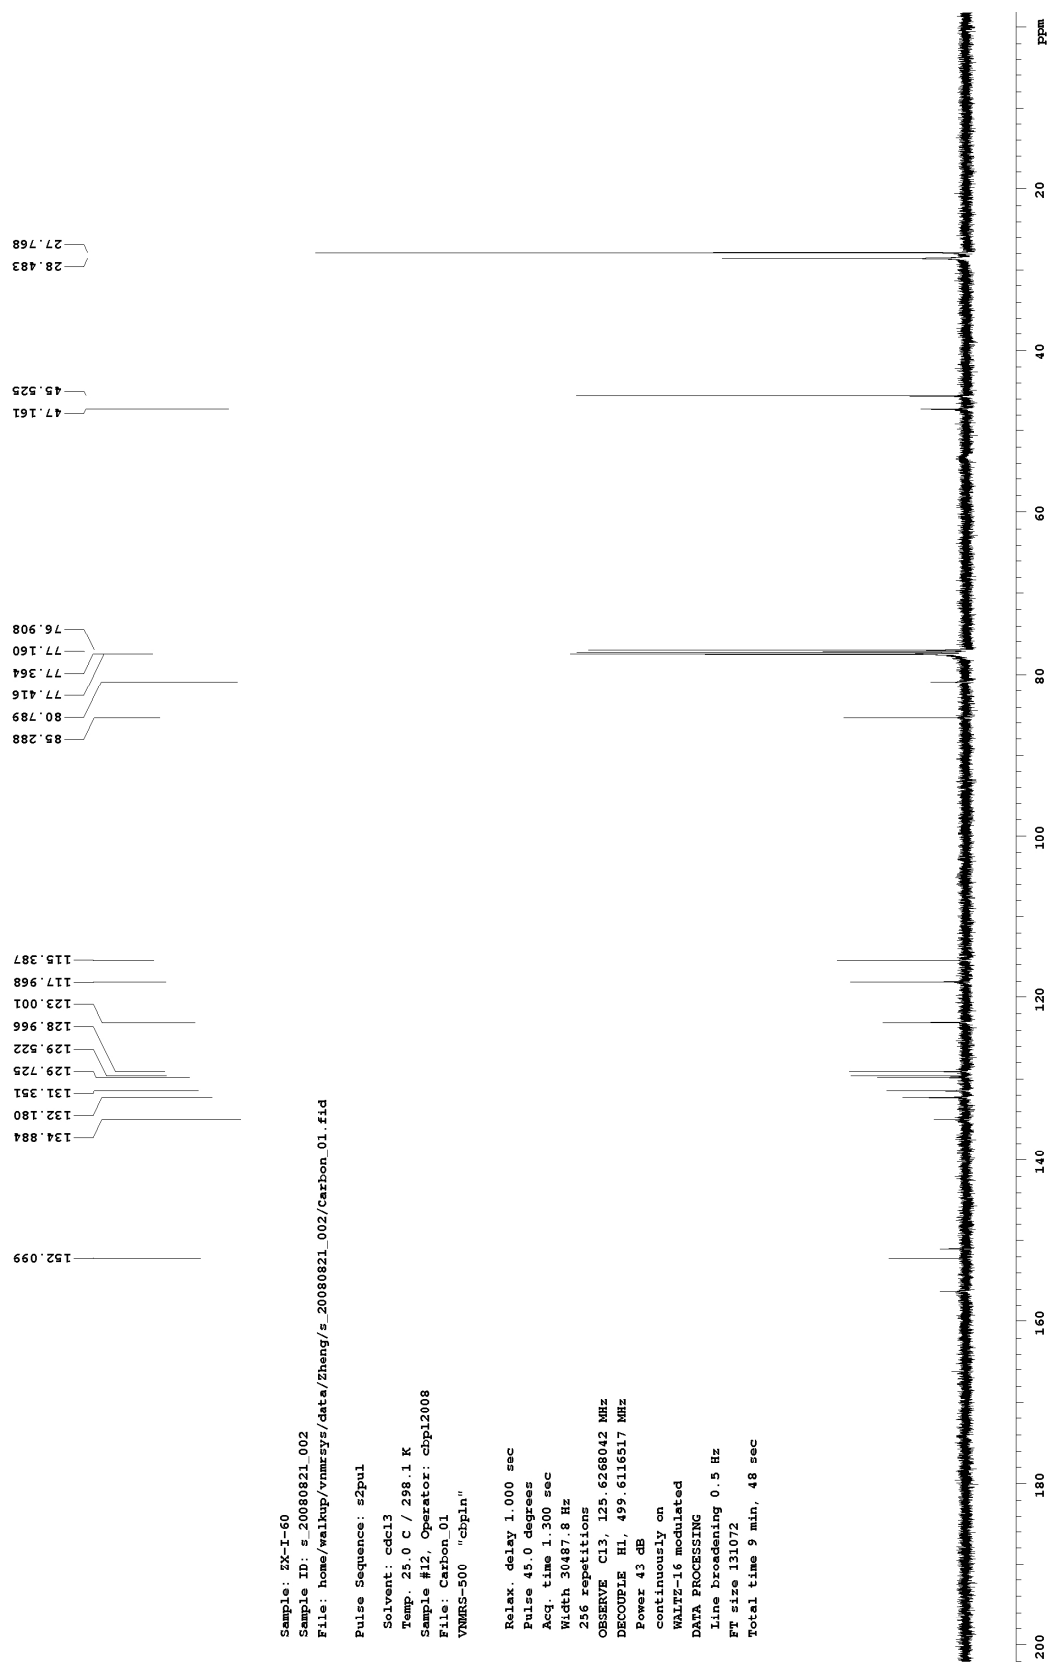

<sup>1</sup>H NMR (500 MHz, CDCl<sub>3</sub>) of Compound 11

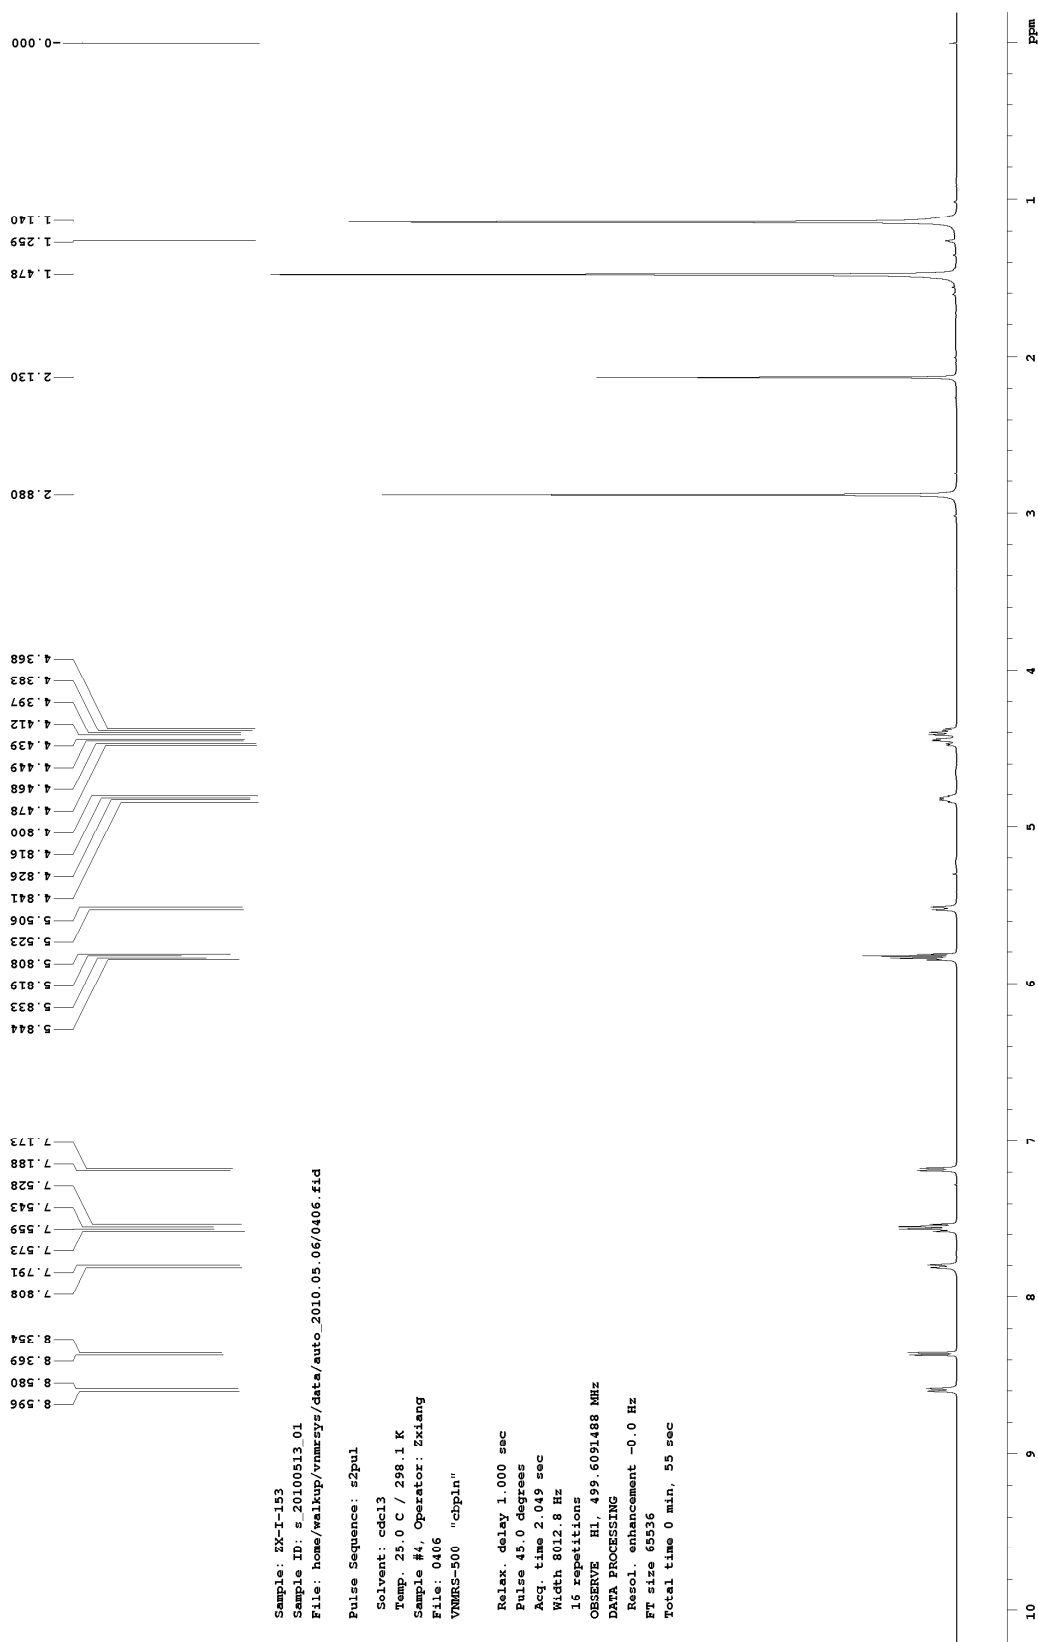

<sup>13</sup>C NMR (125 MHz, CDCl<sub>3</sub>) of Compound 11

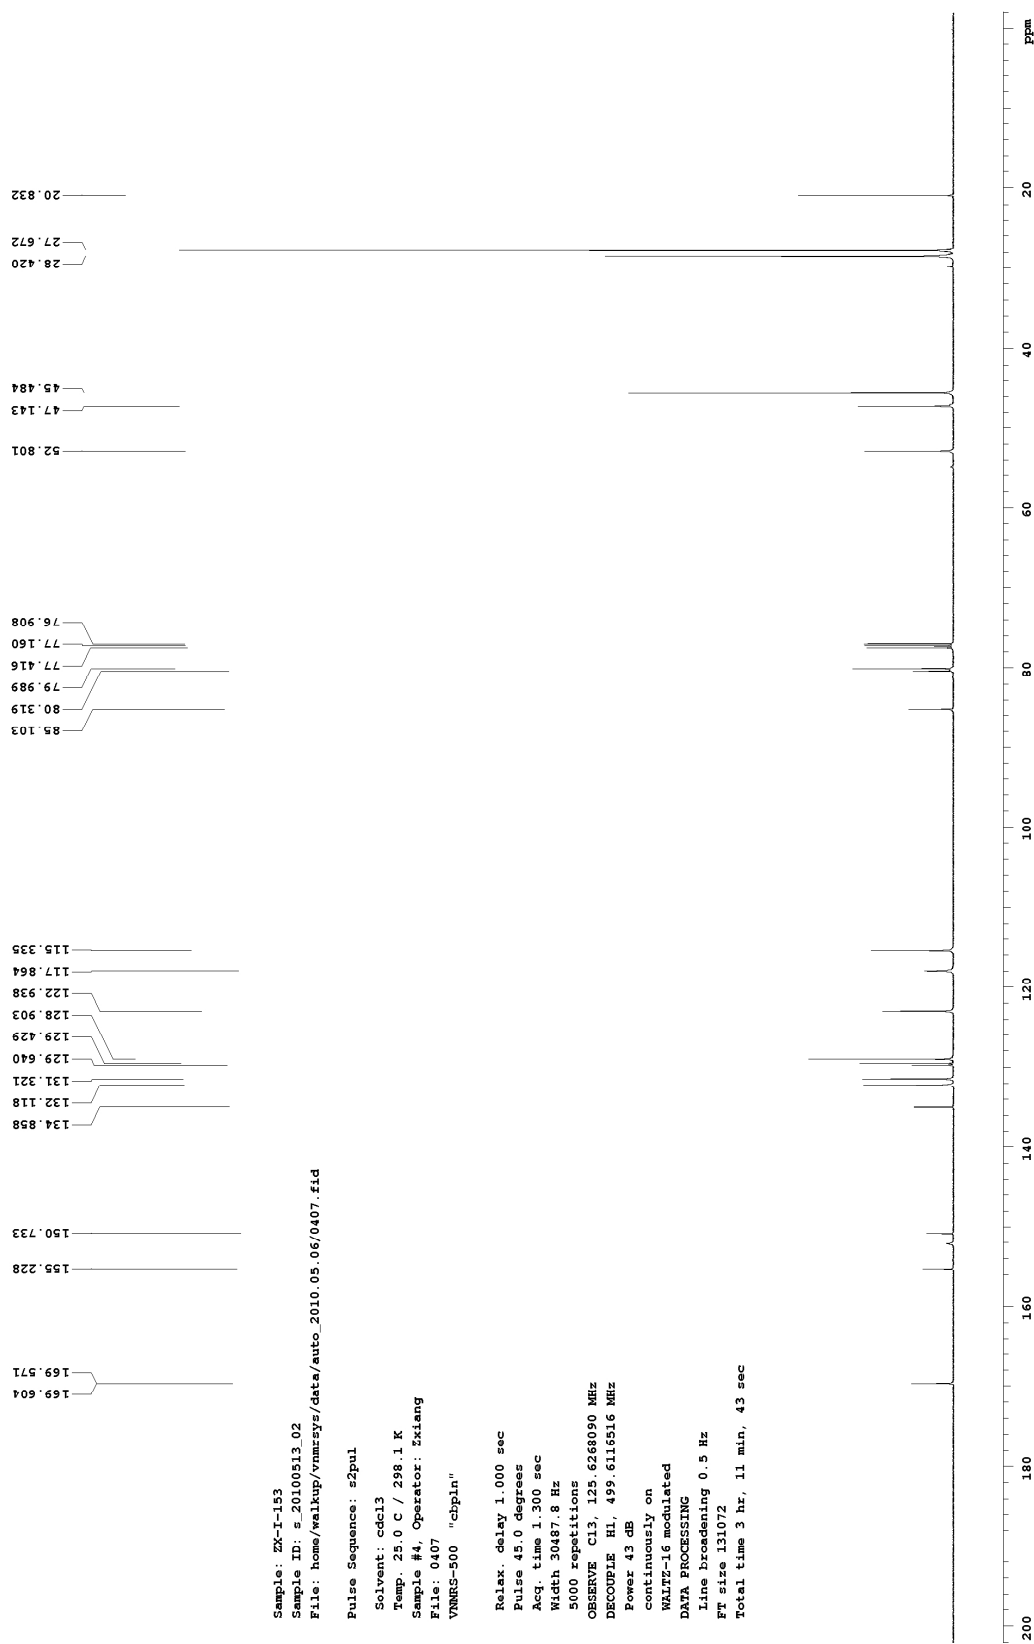

<sup>1</sup>H NMR (500 MHz, d6-DMSO) of Compound 4

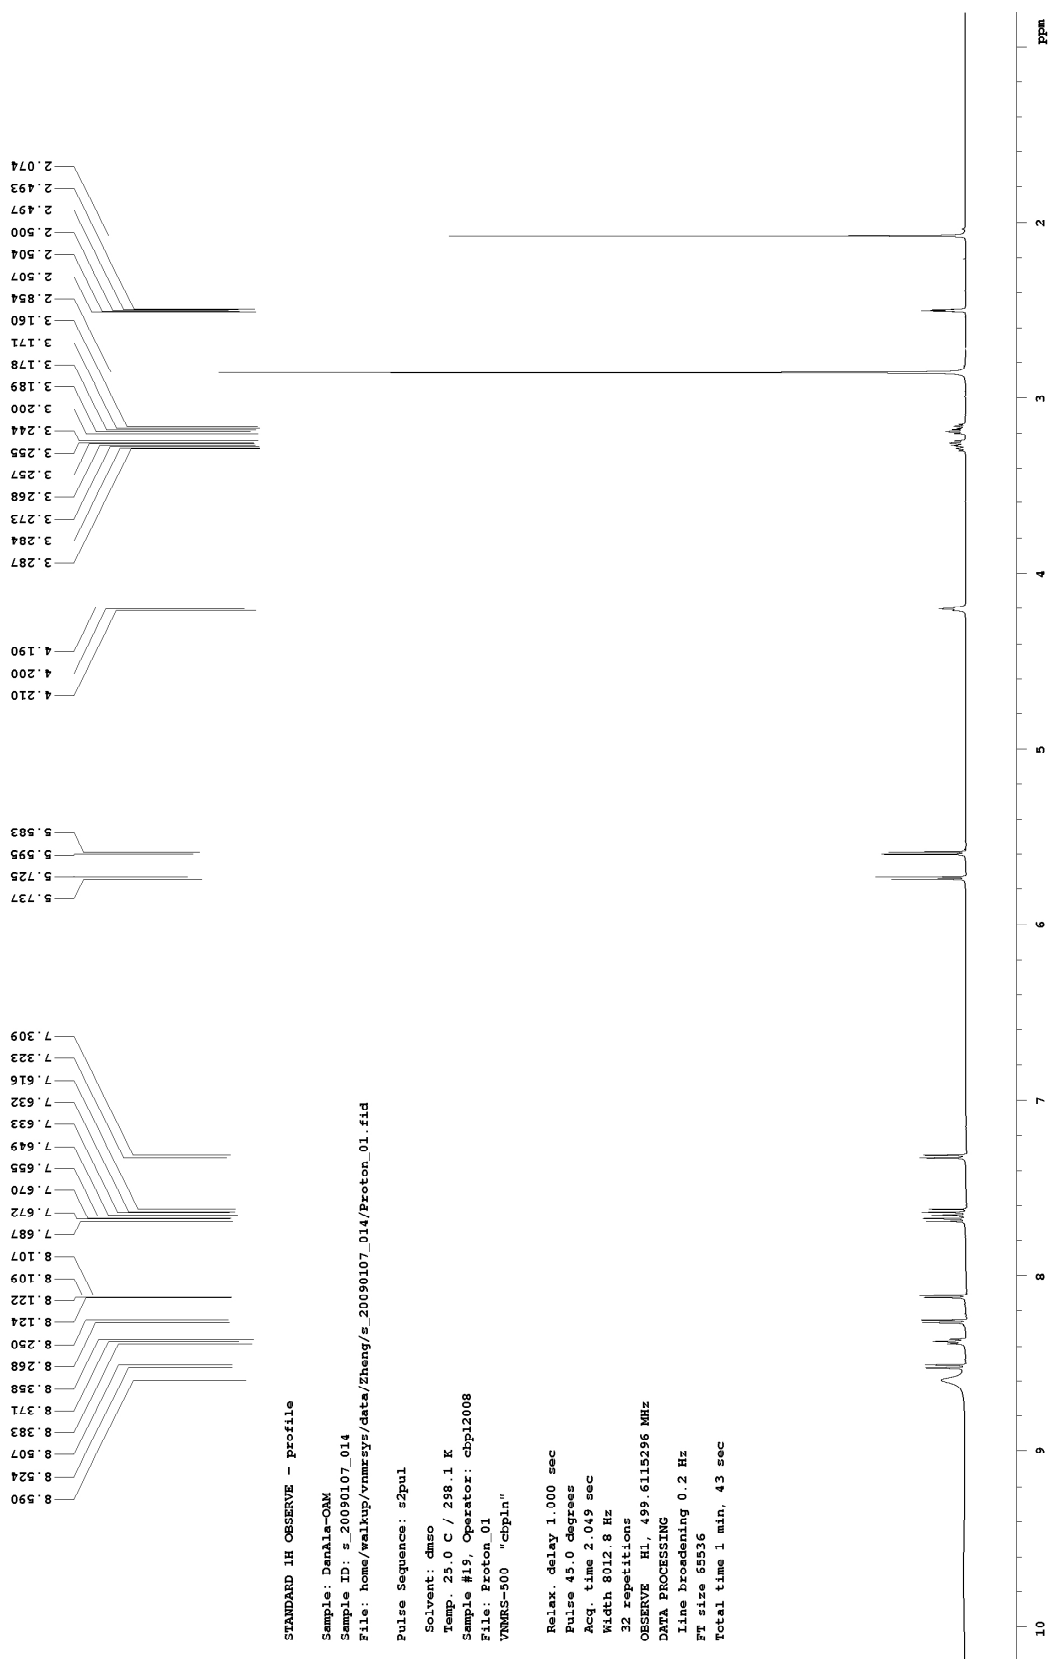

<sup>13</sup>C NMR (125 MHz, d6-DMSO) of Compound 4

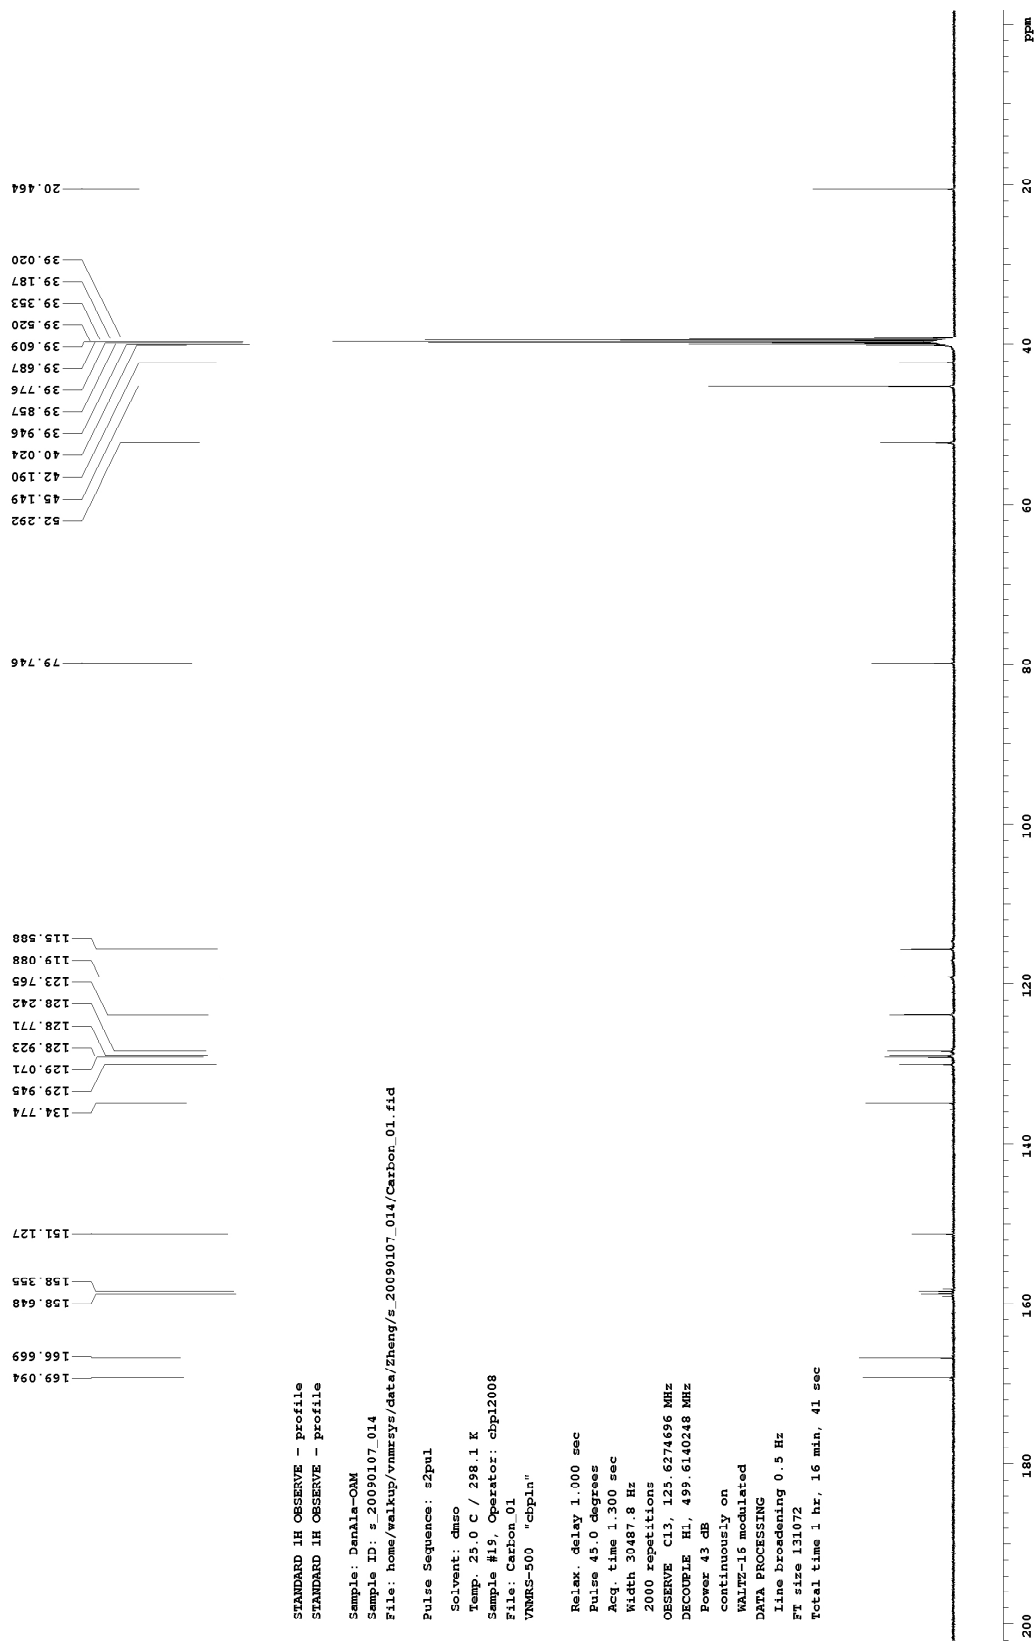

Supplement: NIHMS255763-supplement-supporting_information.pdf [file NIHMS255763-supplement-supporting_information.pdf]
